# Supplementary material for: Assembly line termination in cylindrocyclophane biosynthesis: discovery of an editing type II thioesterase domain in a type I polyketide synthase
Source: PubMed Central journal article supplement — Chem Sci. 2015 Apr 14;6(7):3816–22. doi: 10.1039/c4sc03132f (PMC5707447; doi:10.1039/c4sc03132f), 2015-04-14
Supplement: SC-006-C4SC03132F-s001.pdf [file SC-006-C4SC03132F-s001.pdf]

## Supplementary Information

### **Assembly Line Termination in Cyliandrocyophane Biosynthesis: Discovery of an Editing Type II Thioesterase Domain in a Type I Polyketide Synthase**

Hitomi Nakamura<sup>a</sup>, Jennifer X. Wang<sup>b</sup>, Emily P. Balskus<sup>a\*</sup>

<sup>a</sup>Department of Chemistry and Chemical Biology, Harvard University,  
Cambridge, Massachusetts 02138, USA

<sup>b</sup>Small Molecule Mass Spectrometry Facility, FAS Division of Science,  
Cambridge, Massachusetts 02138, USA

\*Correspondence to: [balskus@chemistry.harvard.edu](mailto:balskus@chemistry.harvard.edu)

## Supplementary Materials

1. **General materials and methods** S3
2. **Cloning, expression and purification of CylI, CylH<sub>PKS</sub>, CylH<sub>PKS</sub>-S1201A, CylH<sub>TE</sub>, CylH<sub>TE</sub>-S95A, and TycF.** S5
3. **Biochemical characterization of CylH<sub>PKS</sub> and CylH<sub>PKS</sub>-S1201A mutant** S12
  - **BODIPY-CoA fluorescent phosphopantetheinylation assay**
  - **LC-MS assay for elongation reaction using CylH<sub>PKS</sub>**
  - **HPLC assay for CylI resorcinol formation using CylH acyl-ACP substrate**
  - **Quantitative LC-MS assay for CylI resorcinol formation using CylH<sub>PKS</sub> acyl-ACP substrate**
4. **Biochemical characterization of CylH<sub>TE</sub> and CylH<sub>TE</sub>-S95A mutant** S19
  - **HPLC assay for CylI resorcinol formation in the presence of CylH<sub>TE</sub>**
  - **Spectrophotometric assay for the hydrolysis activity of CylH<sub>TE</sub>**
  - **Assessment of the substrate scope of CylH<sub>TE</sub>**
5. **Gel autoradiography assay of wild type CylH<sub>PKS</sub> and CylH<sub>PKS</sub>-S1201A mutant using [Acetyl-1-<sup>14</sup>C]-Coenzyme A** S23
6. **Bioinformatics of the CylH TE domain and other thioesterases** S23
  - **Multiple sequence alignment of the CylH TE domain with type I and type II TEs**
  - **Generation of homology model using HHpred**
  - **Construction of phylogenetic tree**
  - **Protein BLAST search for other TE domains with sequence homology to type II TEs**
7. **Chemical synthesis procedures and characterization data** S30
  - **Synthesis of CylH substrate 10**
  - **Synthesis of standard for hydrolysis product 11**
  - **Synthesis of internal standards 13 and 14 for the quantitative LC-MS assay**
  - **General method for preparation of acyl-SNAC substrates for spectrophotometric assay**

## 1. General Materials and Methods

All chemicals were obtained from Sigma-Aldrich except for EDC•HCl (Creosalus, Advanced Chemtech), glycerol (Avantor Performance Materials, Macron Fine Chemicals), and [Acetyl- $^{14}\text{C}$ ]-Coenzyme A (Perkin Elmer). Solvents were obtained from Sigma-Aldrich except ethanol (KOPTEC) and diethyl ether (EMD Millipore). Luria-Bertani Lennox (LB) medium was purchased from EMD Millipore and IPTG was purchased from Teknova. All NMR solvents were purchased from Cambridge Isotope Laboratories.

Oligonucleotide primers were synthesized by Integrated DNA Technologies (Coralville, IA). Recombinant plasmid DNA was purified with a QIAprep Kit from Qiagen. Gel extraction of DNA fragments and restriction endonuclease clean up were performed using an Illustra GFX PCR DNA and Gel Band Purification kit from GE Healthcare. DNA sequencing was performed by Beckman Coulter Genomics (Danvers, MA). Nickel-nitrilotriacetic acid-agarose (Ni-NTA) resin was purchased from Qiagen and Thermo Scientific. SDS-PAGE gels were purchased from Bio-Rad.

Gel filtration FPLC was performed on a BioLogic DuoFlow Chromatography System (Bio-Rad) equipped with a Superdex column, 200 10/300 GL or 200 26/600 PG (GE Healthcare). Bovine thyroglobulin (670 kDa), bovine  $\gamma$ -globulin (158 kDa), chicken ovalbumin (44 kDa), horse myoglobin (17 kDa), and vitamin B<sub>12</sub> (1350 Da) were used as molecular weight markers (Bio-Rad, #151-190). The molecular weights of the proteins analyzed by gel filtration were calculated from their elution volume, using a linear relationship between  $\log(\text{molecular weight})$  and  $v_e/v_0$  (elution volume/void volume). Protein concentrations were determined according to the method of Bradford using bovine serum albumin (BSA) as a standard,<sup>1</sup> or using a NanoDrop 2000 UV-Vis Spectrophotometer (Thermo Scientific) for CylH<sub>PKS</sub> ( $\epsilon = 169,820 \text{ M}^{-1}\text{cm}^{-1}$ ) and CylH<sub>TE</sub> ( $\epsilon = 30,035 \text{ M}^{-1}\text{cm}^{-1}$ ). The extinction coefficients for CylH<sub>PKS</sub> and CylH<sub>TE</sub> were calculated using ExPASy ProtParam tool.<sup>2</sup> Optical densities of *E. coli* cultures were determined with a DU 730 Life Sciences UV/Vis spectrophotometer (Beckman Coulter) by measuring absorbance at 600 nm.

Analytical HPLC was performed on a Dionex Ultimate 3000 instrument (Thermo Scientific) using a Chromolith RP-18e endcapped monolithic silica column (4.6 x 100 mm, EMD Millipore). High-resolution mass spectral data and the spectrophotometric assay data were obtained in the Small Molecule Mass Spectrometry Facility, FAS Division of Science. Mass spectral data were obtained on an Agilent 1290 Infinity UHPLC system (Agilent Technologies) and a maXis impact UHR time-of-flight mass spectrometer system (Bruker Daltonics Inc) equipped with an electrospray ionization (ESI) source or a 6460 Triple Quadrupole mass spectrometer (Agilent Technologies) equipped with an electrospray ionization (ESI) source with Agilent Jet Stream technology. Spectrophotometric assay was performed on Spectramax i3 Plate Reader (Molecular Devices).

Proton nuclear magnetic resonance ( $^1\text{H}$  NMR) spectra and carbon nuclear magnetic resonance ( $^{13}\text{C}$  NMR) spectra were obtained on a Varian Inova-500 (500 MHz, 125 MHz), Varian-Mercury 400 (400 MHz, 100 MHz) or Varian-Mercury 300 (300 MHz, 75 MHz) NMR spectrometers in the Magnetic Resonance Laboratory in the Harvard University Department of Chemistry and Chemical Biology. Chemical shifts are reported in parts per million downfield from tetramethylsilane using the solvent resonance as internal standard for  $^1\text{H}$  ( $\text{CDCl}_3$ ,  $\delta_{\text{H}} = 7.26$  ppm) and  $^{13}\text{C}$  ( $\text{CDCl}_3$ ,  $\delta_{\text{C}} = 77.16$  ppm). Data are reported as follows: chemical shift, multiplicity (s = singlet, d = doublet, t = triplet, m = multiplet), integration, and coupling constant. NMR spectra were visualized using iNMR Version 5.3.6 (Mestrelab Research).

High-resolution mass spectral (HRMS) data for the synthetic compounds were obtained in the Magnetic Resonance Laboratory in the Harvard University Department of Chemistry and Chemical Biology on a Bruker Micro qTOF-QII fitted with a dual-spray electrospray ionization (ESI) source or in the Small Molecule Mass Spectrometry Facility, FAS Division of Science on an Agilent 6210 TOF. The capillary voltage was set to 4.5 kV and the end plate offset to  $-500$  C, the drying gas temperature was maintained at  $190$  °C with a flow rate of 8 L/min and a nebulizer pressure of 21.8 psi. The liquid chromatography (LC) was performed using an Agilent Technologies 1100 series LC with 50%  $\text{H}_2\text{O}$  and 50% acetonitrile as solvent.

## 2. Cloning, overexpression and purification of CylI, CylH tetra-domain, and standalone TE domain.

N-His<sub>6</sub>-tagged CylI was cloned, expressed and purified according to a previously published procedure.<sup>3</sup> pET30a-TycF was obtained from the Walsh group, and TycF was expressed and purified following a previously reported procedure.<sup>4</sup>

**Table S1.** Oligonucleotides used for cloning (restriction sites underlined).

| Oligo               | Sequence                                       | Target                                                                                            |
|---------------------|------------------------------------------------|---------------------------------------------------------------------------------------------------|
| CylH-KS-F-NdeI      | 5' CCGCCC <u>CATATGA</u> ATACTGTTATTTCCAAGC 3' | CylH <sub>PKS</sub> (KS-AT-T-TE)                                                                  |
| CylH-RC-XhoI-nostop | 5' GCCC <u>TCGAG</u> ATTGATTGTACAGAAAATAG 3'   |                                                                                                   |
| TE-20aa-F-NdeI      | 5' GCACGAC <u>CATATGA</u> AGGTTGTAGATGAAGCC 3' | CylH <sub>TE</sub>                                                                                |
| TE-RC-XhoI-nostop   | 5' GTAGGG <u>CTCGAG</u> GAAAATAGTCTCTTCAAT 3'  |                                                                                                   |
| CylH-TE-S74A        | 5' CATTTCGCGTCATGATATGGGAGCACTACTC 3'          | TE active site serine to alanine mutants CylH <sub>PKS</sub> -S1201A and CylH <sub>TE</sub> -S95A |
| CylH-TE-S74A-RC     | 5' GAGTAGTGCTCCCATATCATGACCGAAAATG 3'          |                                                                                                   |

### Cloning of *cylH* tetra-domain and TE domain

CylH<sub>PKS</sub> (KS-AT-T-TE) and cylH<sub>TE</sub> (TE domain only) were PCR amplified from *Cylindrospermum licheniforme* ATCC 29412 genomic DNA using the primers shown in **Table S1**: cylH<sub>PKS</sub> (forward primer **CylH-KS-F-NdeI** + reverse primer **CylH-RC-XhoI-nostop**), and cylH<sub>TE</sub> (forward primer **TE-20aa-F-NdeI** + reverse primer **TE-RC-XhoI-nostop**). All forward primers have *NdeI* restriction sites and all reverse primers have *XhoI* restriction sites. All PCR reactions contained Phusion High-Fidelity PCR Master Mix (New England BioLabs), 50-100 ng DNA template, and 25 pmoles of each primer in a total volume of 50 μL. Thermocycling was carried out in a C1000 Gradient Cycler (Bio-Rad) using the following parameters: denaturation for 30 sec at 98 °C, followed by 30 (cylH<sub>PKS</sub>) or 35 cycles (cylH<sub>TE</sub>) of 10 sec at 98 °C, 30 sec at 56 °C, 5 min (cylH<sub>PKS</sub>) or 45 sec (cylH<sub>TE</sub>) at 72 °C, and a final extension time of 10 min at 72 °C. PCR reactions were analyzed by agarose gel electrophoresis with ethidium bromide staining, pooled, and purified.

Amplified fragments were digested with *NdeI* and *XhoI* (New England BioLabs) for 2.5 h at 37 °C. Digests contained 1 µL water, 3 µL NEB buffer 4 (10x), 3 µL of BSA (10x), 20 µL of PCR product, 1.5 µL of *NdeI* (20 U/µL), and 1.5 µL of *XhoI* (20 U/µL). Restriction digests were purified directly using agarose gel electrophoresis; gel fragments were further purified using the Illustra GFX kit. The digests were ligated into linearized expression vector using T4 DNA ligase (New England BioLabs). Both *cylH*<sub>PKS</sub> and *cylH*<sub>TE</sub> digested inserts were ligated into the pET-29b vector to encode a C-terminal His<sub>6</sub>-tagged construct. Ligations were incubated at 16 °C overnight and contained 3 µL water, 1 µL T4 Ligase Buffer (10x), 1 µL digested vector, 3 µL digested insert DNA, and 2 µL T4 DNA Ligase (400 U/µL). 5 µL of each ligation was used to transfer a single tube of chemically competent *E. coli* TOP10 cells (Invitrogen). The identities of the resulting pET29b-*cylH*<sub>PKS</sub> and pET29b-*cylH*<sub>TE</sub> constructs were confirmed by sequencing of purified plasmid DNA. The pET29b-*cylH*<sub>PKS</sub> and pGro7 (Takara) were co-transformed into chemically competent *E. coli* BL21 (DE3) cells (Invitrogen), while the pET29b-*cylH*<sub>TE</sub> was transformed into *E. coli* BL21 (DE3) cells by itself. The resulting transformants were stored at –80 °C as frozen 1:1 LB/glycerol stocks.

#### Site-directed mutagenesis of the CylH TE domain

Site-directed mutagenesis of the TE domains of CylH<sub>PKS</sub> and CylH<sub>TE</sub> were performed using the corresponding oligonucleotides (**CylH-TE-S74A** and **CylH-TE-S74A-RC**) listed in **Table S1**. The residue mutated was the catalytic Ser74 residue on the CylH TE domain, which corresponded to Ser1201 on CylH<sub>PKS</sub> and Ser95 on CylH<sub>TE</sub>. The catalytic serine residue (S74) for mutagenesis was identified through multiple sequence alignment of the CylH TE domain with 8 other previously characterized TE domains by ClustalW in Geneious Pro Version 7.1.6 software (**Fig. S1**).<sup>5</sup>

PCR reactions of 50 µL contained 25 µL of Phusion High Fidelity PCR Master Mix (New England BioLabs), 10 ng of pET29b-*cylH*<sub>PKS</sub> or pET29b-*cylH*<sub>TE</sub> template, and 15 pmoles of each primer. Thermocycling was carried out in a C1000 Gradient Cycler (Bio-Rad) using the following parameters: denaturation for 1 min at 95 °C, followed by 18 cycles of 30 sec at 95 °C, 1 min at 57 °C, and 6 min (*cylH*<sub>TE</sub>) or 9.5 min (*cylH*<sub>PKS</sub>) at 70 °C. Digestion of the methylated template plasmid was performed with DpnI (New England BioLabs), and 5 µL of each digestion

was used to transform a single tube of chemically competent *E. coli* TOP10 cells. The identities of the resulting pET29b-*cylH*<sub>PKS</sub>-S1201A and pET29b-*cylH*<sub>TE</sub>-S95A constructs were confirmed by sequencing purified plasmid DNA. pET29b-*cylH*<sub>PKS</sub>-S1201A and pGro7 (Takara) plasmids were co-transformed into chemically competent *E. coli* BL21 (DE3) cells (Invitrogen), while the pET29b-*cylH*<sub>TE</sub>-S95A plasmid was transformed into *E. coli* BL21 (DE3) cells by itself. The resulting transformants were stored at -80 °C as frozen 1:1 LB/glycerol stocks.

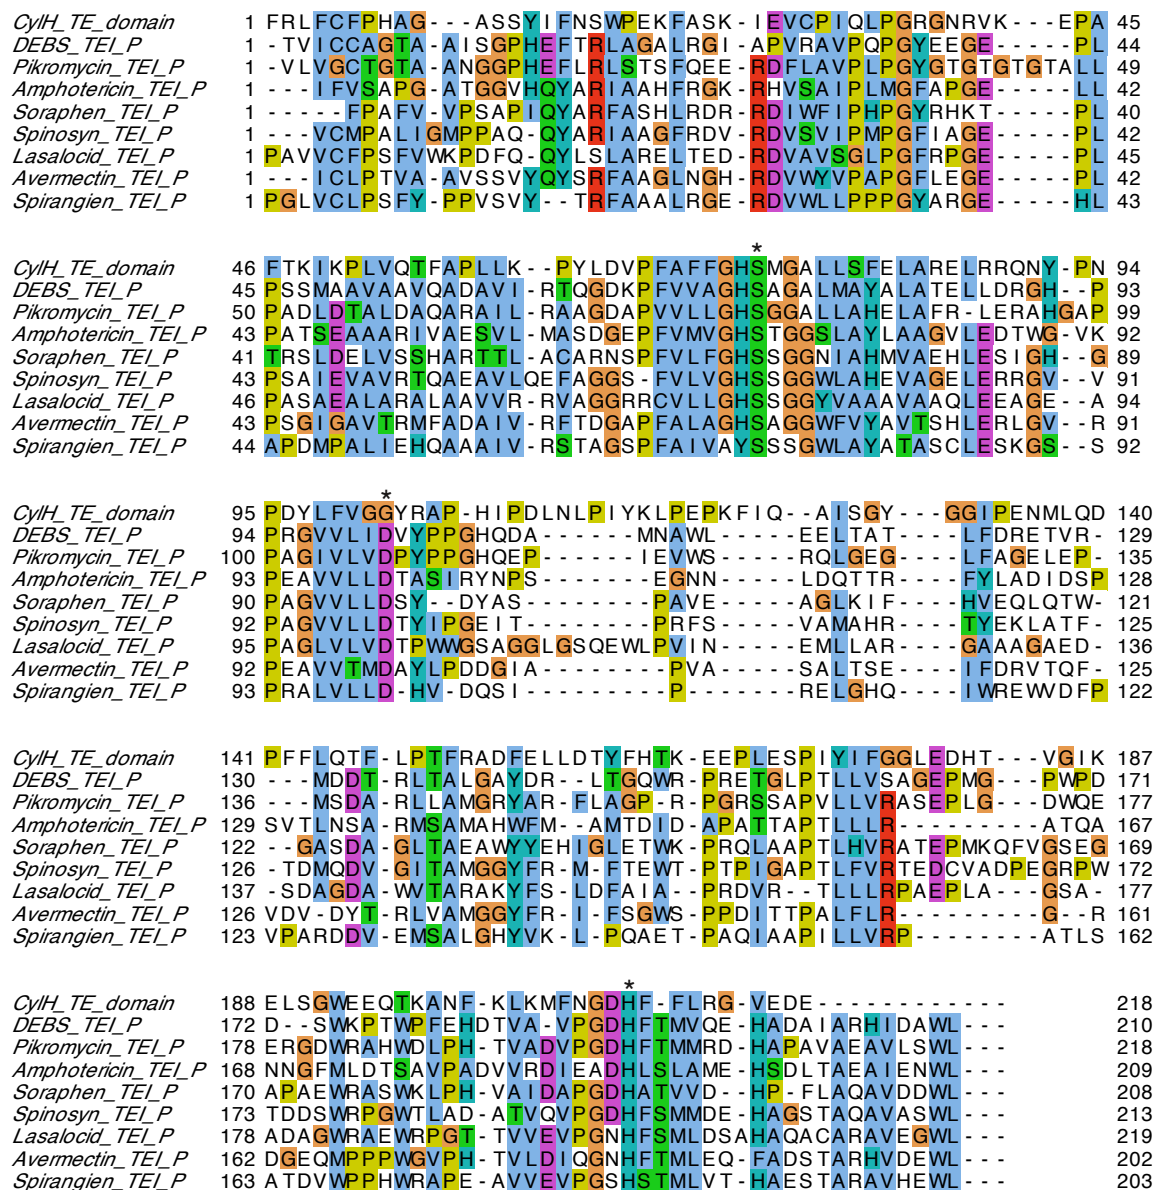

**Figure S1.** Multiple sequence alignment of the CylH TE domain with other previously characterized C terminal TE domains of type I modular PKS enzymes by ClustalW. The catalytic serine, aspartate and histidine residues are marked with asterisk (\*).

## Large scale overexpression and purification of CylH<sub>PKS</sub>, CylH<sub>TE</sub>, and the TE domain mutants

**CylH<sub>PKS</sub> and CylH<sub>PKS</sub>-S1201A mutant:** A 50 mL starter culture of pET29b-*cylH<sub>PKS</sub>* + pGro7 BL21 *E. coli* was inoculated with frozen stock and grown overnight at 37 °C in LB medium supplemented with 50 µg/mL kanamycin and 34 µg/mL chloramphenicol. Overnight cultures were diluted 1:100 into 2 L LB medium containing kanamycin and chloramphenicol. Expressions of GroES and GroEL were induced by addition of 0.5 mg/mL of L-arabinose. The cultures were incubated at 37 °C with 175 rpm shaking until OD<sub>600</sub> = 0.3–0.45. The cultures were then transferred to 15 °C, protein expression was induced with 100 µM of IPTG when OD<sub>600</sub> = 0.65–0.75, and the cultures were incubated at 15 °C for ~20 h.

**CylH<sub>TE</sub> and CylH<sub>TE</sub>-S95A mutant:** A 50 mL starter culture of pET29b-*cylH<sub>TE</sub>* BL21 *E. coli* was inoculated with frozen stock and grown overnight at 37 °C in LB medium supplemented with 50 µg/mL kanamycin. Overnight cultures were diluted 1:100 into 2 L LB medium containing kanamycin. The cultures were incubated at 37 °C with 175 rpm shaking until OD<sub>600</sub> = 0.3–0.45, and the cultures were transferred to 15 °C incubator. The protein expression was induced with 500 µM of IPTG when OD<sub>600</sub> = 0.65–0.75, and incubated at 15 °C for ~18 h.

Cells from 2 L of culture were pelleted by centrifugation (6,000 rpm x 15 min) and resuspended in 40 mL of lysis buffer (CylH<sub>PKS</sub> and CylH<sub>PKS</sub>-S1201A mutant = 100 mM potassium phosphate, 300 mM NaCl, pH 8.0; CylH<sub>TE</sub> and CylH<sub>TE</sub>-S95A = 25 mM Tris•HCl, 500 mM NaCl, 10 mM MgCl<sub>2</sub>, pH 8.5) supplemented with EDTA-free Pierce Protease Inhibitor Tablets (Thermo Fisher). The cells were lysed by passage through a cell disruptor (Avestin EmulsiFlex-C3) twice at 8,000–10,000 psi, and the lysate was clarified by centrifugation (13,000 rpm x 30 min). The supernatant was incubated with 2 mL of Ni-NTA resin and 5 mM imidazole for 2 h at 4 °C. The mixture was centrifuged (4,000 rpm x 5 min) and the unbound fraction was discarded. The Ni-NTA was resuspended in 10 mL of wash buffer 1 (lysis buffer containing 20 mM imidazole), loaded into a glass column, and washed with 50 mL of wash buffer 1. CylH<sub>PKS</sub> and CylH<sub>PKS</sub>-S1201A mutant was washed further with 50 mL of wash buffer 2 (lysis buffer containing 40 mM imidazole). Protein was eluted from the column using a stepwise imidazole gradient in elution buffer (50 mM, 100 mM, 200 mM) and collecting 5 mL fractions. SDS-PAGE analysis (4–15% Mini-PROTEAN TGX precast gel) was employed to determine the presence and purity of



protein in each fraction. Fractions containing the desired protein were combined and dialyzed twice against 2 L of dialysis buffer (CylH<sub>PKS</sub> and CylH<sub>PKS</sub>-S1201A mutant = 50 mM potassium phosphate, 100 mM NaCl, pH 8.0; CylH<sub>TE</sub> and CylH<sub>TE</sub>-S95A mutant = 25 mM Tris•HCl, 50 mM NaCl, pH 8.5). The collected proteins were further purified by size-exclusion gel filtration using FPLC. Fractions containing protein were combined and dialyzed against storage buffer (CylH<sub>PKS</sub> and CylH<sub>PKS</sub>-S1201A mutant = 50 mM potassium phosphate, 100 mM NaCl, pH 8.0; CylH<sub>TE</sub> and CylH<sub>TE</sub>-S95A mutant = 25 mM Tris•HCl, 50 mM NaCl, 10% glycerol, pH 8.5). The solutions were concentrated using a Spin-X® UF 20 mL centrifugal concentrator with a 100,000 (CylH<sub>PKS</sub>) or 10,000 (CylH<sub>TE</sub>) MWCO membrane (Corning®), and the concentrated protein solutions were frozen with liquid N<sub>2</sub> for storage at -80 °C. This procedure afforded yields of 1.5–1.7 mg/L for the C-His<sub>6</sub>-tagged CylH<sub>PKS</sub>, 1.7–2.5 mg/L of the C-His<sub>6</sub>-tagged CylH<sub>PKS</sub>-S1201A mutant, 8.3 mg/L for the C-His<sub>6</sub> tagged CylH<sub>TE</sub>, and 6.0 mg/L for the C-His<sub>6</sub> tagged CylH<sub>TE</sub>-S95A mutant (**Fig. S2**).

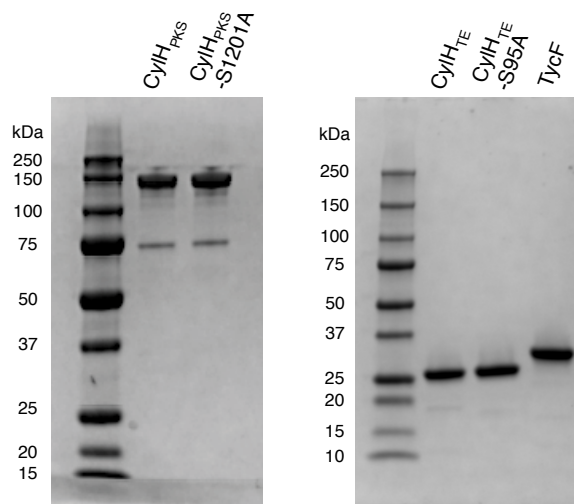

**Fig. S2** SDS-PAGE of purified His<sub>6</sub>-tagged CylI, CylH<sub>PKS</sub>, and CylH<sub>PKS</sub> S1201A mutant run on 10% Mini-PROTEAN TGX precast gel (Bio-Rad) (*left*); CylH<sub>TE</sub>, CylH<sub>TE</sub>-S95A mutant, and TycF run on 4-15% Mini-PROTEAN TGX precast gel (Bio-Rad) (*right*). (MW=Precision Plus Protein™ All Blue Standards (Bio-Rad)).

## Determination of the molecular mass of the CylH<sub>PKS</sub>, CylH<sub>TE</sub>, and the TE domain mutants

A ~50  $\mu$ M solution of purified protein was analyzed by gel filtration during large-scale purification as described in ‘general materials and methods’. The CylH<sub>PKS</sub> was eluted over 72 min with 50 mM potassium phosphate buffer pH 8, 100 mM NaCl at 0.5 mL/min using Superdex 200 30/100 GL column (**Fig. S3b**). CylH<sub>PKS</sub>-S1201A mutant was eluted over 450 min with the same buffer as the wild type CylH<sub>PKS</sub> at 0.8 mL/min using a Superdex 200 26/600 PG column (**Fig. S3d**). CylH<sub>TE</sub> and CylH<sub>TE</sub>-S95A mutant were eluted over 450 min with 25 mM Tris•HCl pH 8.5, 50 mM NaCl at 0.8 mL/min using a Superdex 200 26/600 PG column (**Fig. S3 e and f**). A solution of molecular weight markers was analyzed under the same conditions (**Fig. S3 a and c**).

Molecular weight analysis by gel filtration shows that CylH<sub>PKS</sub> exists as mixture of oligomers and dimers in solution (**Table S2**). Fractions that contained dimeric CylH<sub>PKS</sub> were collected separately and used for subsequent biochemical assays. CylH<sub>PKS</sub>-S1201A mutant mainly exists as dimers. CylH<sub>TE</sub> and CylH<sub>TE</sub>-S95A both exist as monomers. Interestingly, known structures of type I TEs on type I modular PKS assembly lines are dimers while type II TEs are monomers.<sup>6</sup>

**Table S2.** Molecular weight analysis of CylH<sub>PKS</sub>, CylH<sub>TE</sub> and their mutants by gel filtration

| Protein                            | Calculated MW (kDa) | Observed MW (kDa) |
|------------------------------------|---------------------|-------------------|
| CylH <sub>PKS</sub>                | 152.7               | 739.8<br>411.5    |
| CylH <sub>PKS</sub> -S1201A mutant | 152.7               | 402.1             |
| CylH <sub>TE</sub>                 | 29.8                | 21.0              |
| CylH <sub>TE</sub> -S95A mutant    | 29.8                | 22.0              |

<sup>a</sup> Molecular weights were calculated for the C-terminal His<sub>6</sub>-tagged constructs using ExPASy Compute pI/Mw tool ([http://web.expasy.org/compute\\_pi/](http://web.expasy.org/compute_pi/)).

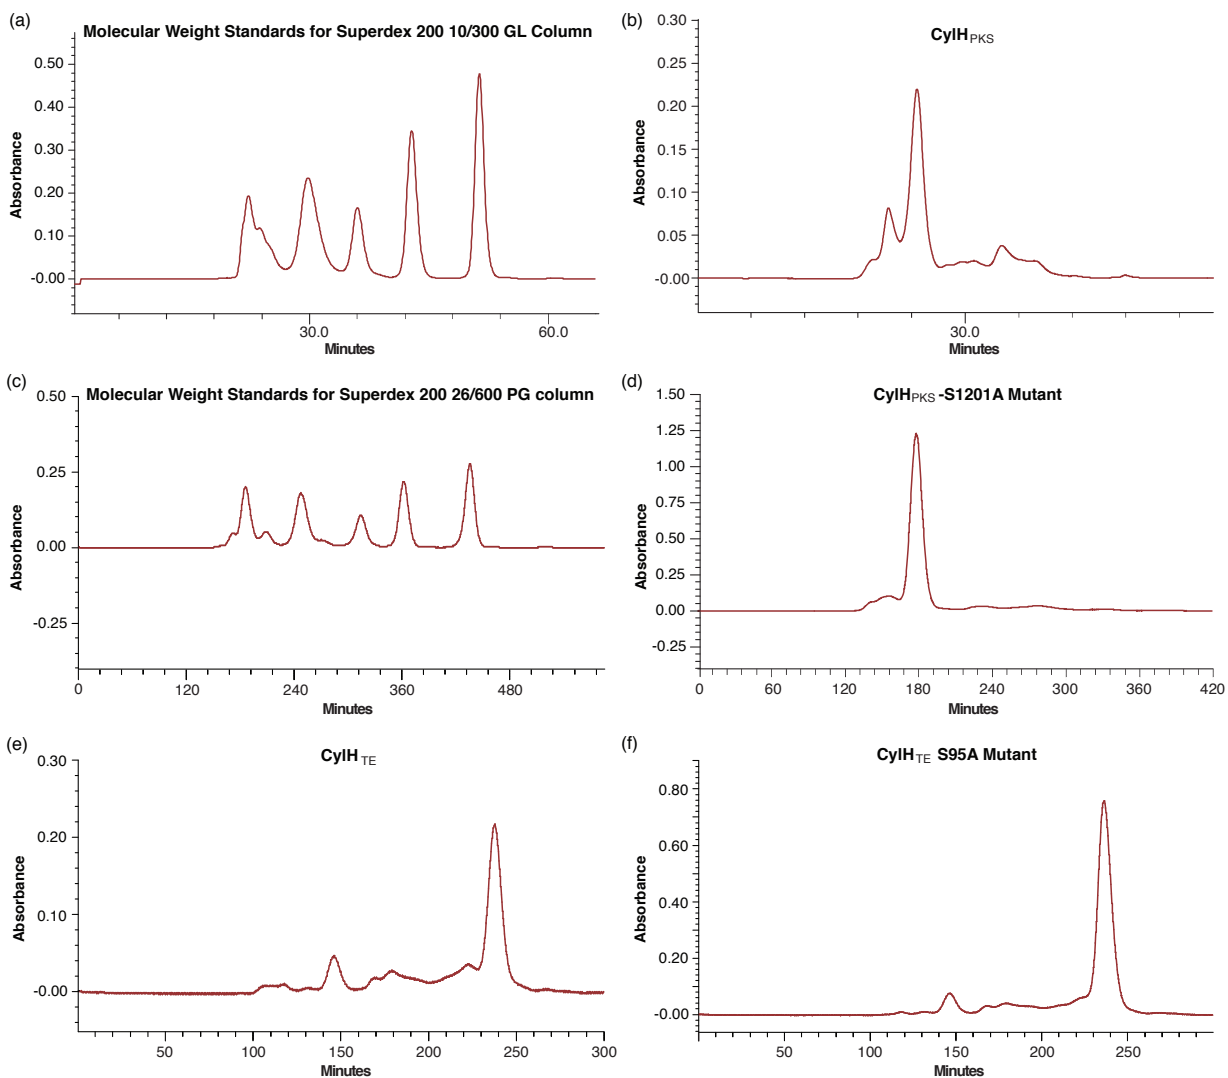

**Fig. S3** Determination of CyIH molecular mass via size exclusion chromatography. FPLC chromatogram using the Superdex 200 10/300 GL column of the (a) molecular weight standards and (b) CyIH<sub>PKS</sub>; FPLC chromatogram using the Superdex 200 26/600 PG column of the (c) molecular weight standards, (d) CyIH<sub>PKS</sub>-S1201A mutant, (e) CyIH<sub>TE</sub>, and (f) CyIH<sub>TE</sub>-S95A mutant.

### 3. Biochemical characterization of CylH<sub>PKS</sub> and CylH<sub>PKS</sub>-S1201A mutant

#### BODIPY-CoA fluorescent phosphopantetheinylation assay

BODIPY-CoA<sup>7</sup> and Sfp<sup>8</sup> were prepared using previously reported procedures. Reaction mixtures (25  $\mu$ L) contained 2  $\mu$ M CylH<sub>PKS</sub> (wild type or S1201A mutant), 10  $\mu$ M Sfp, 25  $\mu$ M BODIPY-CoA, 2 mM MgCl<sub>2</sub>, 1 mM DTT and 50 mM potassium phosphate pH 8.0. Reactions were incubated in the dark at room temperature for 1 h. Reaction mixtures were diluted 1:1 in 2x Laemmli sample buffer (Bio-Rad), boiled for 10 min, and then separated by SDS-PAGE on a 4-15% Mini-PROTEAN TGX precast gel. The gel was first imaged at  $\lambda = 365$  nm, then stained with Coomassie and imaged again (**Fig. S4**). The relative amount of BODIPY-CoA loading for CylH<sub>PKS</sub> and CylH<sub>PKS</sub>-S1201A was quantified by taking the ratios of the band intensities of Coomassie stain and BODIPY absorption at 365 nm. The analysis shows that 80% of CylH<sub>PKS</sub> is loaded with BODIPY relative to CylH<sub>PKS</sub>-S1201A (**Table S3**).

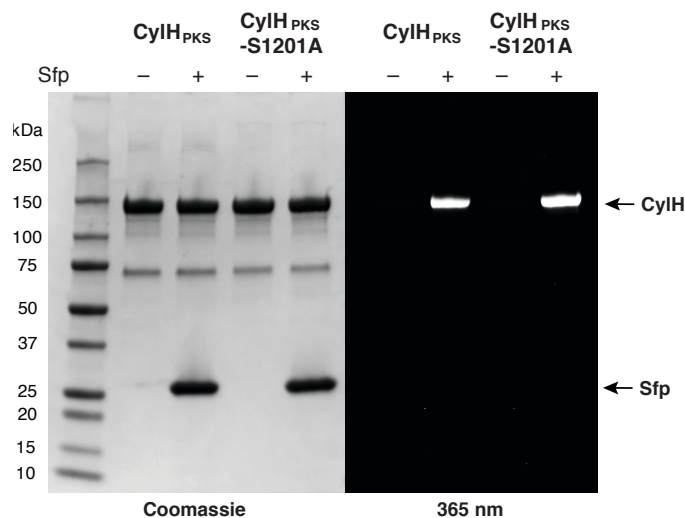

**Fig. S4** Phosphopantetheinyl transferase Sfp can recognize and load the ACP domain of *apo* CylH<sub>PKS</sub> with BODIPY-CoA. MW = Precision Plus Protein<sup>TM</sup> All Blue Standards (Bio-Rad).

**Table S3.** Relative quantitation of BODIPY loading assay.

| Sample                      | Coomassie signal intensity | BODIPY signal intensity (365 nm) | Signal ratio (BODIPY/Comassie) | Relative loading |
|-----------------------------|----------------------------|----------------------------------|--------------------------------|------------------|
| CylH <sub>PKS</sub>         | 1893474                    | 1916200                          | 1.012                          | 80%              |
| CylH <sub>PKS</sub> -S1201A | 2097282                    | 2645045                          | 1.261                          | 100%             |

## LC-MS assay for CylH<sub>PKS</sub> elongation reaction

A stock solution of *holo* CylH<sub>PKS</sub> and *holo* CylH<sub>PKS</sub>-S1201A mutant were prepared prior to the assay by incubating 30  $\mu$ M *apo* CylH<sub>PKS</sub> (wild type or S1201A mutant), 5  $\mu$ M Sfp, 250  $\mu$ M CoA, and 1 mM MgCl<sub>2</sub> in 50 mM potassium phosphate buffer pH 8.0 in 100  $\mu$ L volume for 1 h at room temperature. The elongation assay contained 100  $\mu$ M acyl-SNAC substrate **10**, 24  $\mu$ M *holo* CylH<sub>PKS</sub> (wild type or S1201A mutant), and 200  $\mu$ M malonyl-CoA in 100 mM potassium phosphate buffer pH 8.0 in 100  $\mu$ L volume. Reactions were incubated at room temperature for 2 h, and the 50  $\mu$ L of each sample was quenched with 10  $\mu$ L of 1 M KOH. Quenched samples were heated to 65  $^{\circ}$ C for 20 min and then acidified with 10  $\mu$ L of 1.2 M HCl. 50  $\mu$ L of cold acetonitrile was added to each sample and the samples were incubated overnight at  $-20$   $^{\circ}$ C. Samples were thawed on ice and then centrifuged (13,200 rpm x 10 min at 4  $^{\circ}$ C) before LC-MS analyses using a high accuracy Bruker qTOF mass spectrometer in the Small Molecule Mass Spectrometry Facility, Harvard Faculty of Arts and Sciences (FAS) Division of Science.

The UHPLC equipped with a G4220A binary pump, a built-in vacuum degasser and a thermostatted G4226A high performance autosampler was used for the analysis. 8  $\mu$ L Samples were analyzed by LC-MS (8  $\mu$ L injection volume) on an XTerra MS C18 analytical column (2.1 x 50 mm, 3.5  $\mu$ m) equipped with a guard column (2.1 x 10 mm, 3.5  $\mu$ m, Waters Corporation) at a flow rate of 0.35 mL/min with the column temperature maintained at room temperature. The following elution conditions were applied: a gradient increasing from 20% to 70% solvent B in solvent A over 5 min, a gradient increasing to 100% solvent B over 0.1 min, 100% solvent B for 5 min, a gradient decreasing to 20% solvent B in solvent A over 0.1 min, and 20% solvent B in solvent A for 5 min. (solvent A = 10 mM ammonium formate and 0.03% ammonium hydroxide in water; solvent B = 0.03% ammonium hydroxide in acetonitrile).

For the MS detection, the ESI mass spectra data were recorded on a negative ionization mode for a mass range of m/z 50 to 1200; calibration mode, HPC; spectra rate, 1.00 Hz; capillary voltage, 3400 V; nebulizer pressure, 30.0 psi; drying gas (N<sub>2</sub>) flow, 10.0 L/min; drying gas (N<sub>2</sub>) temperature, 220  $^{\circ}$ C. A mass window of  $\pm$  0.005 Da was used to extract the ion of [M-H]<sup>-</sup>. Hydrolysis product **11** was detected only in the full assay with mass accuracy within 5 ppm, a

match between the observed and theoretical isotopic patterns, and a match between the actual samples and the synthetic standard (Table S4 and Fig. S6).

We initially monitored for masses of hydrolysis product **11** as well as ketone **12**, which could form through decarboxylation of **11** (Fig. S5). The amount of **12** detected in the assays, however, was very small, and the mass was not reproducibly detected in all the assays. As a consequence, we only monitored hydrolysis product **11** for the LC-MS assays.

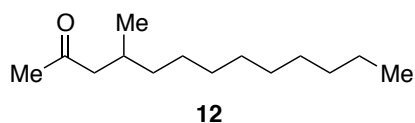

**Figure S5.** Structure of ketone product resulting from decarboxylation of hydrolysis product **11**

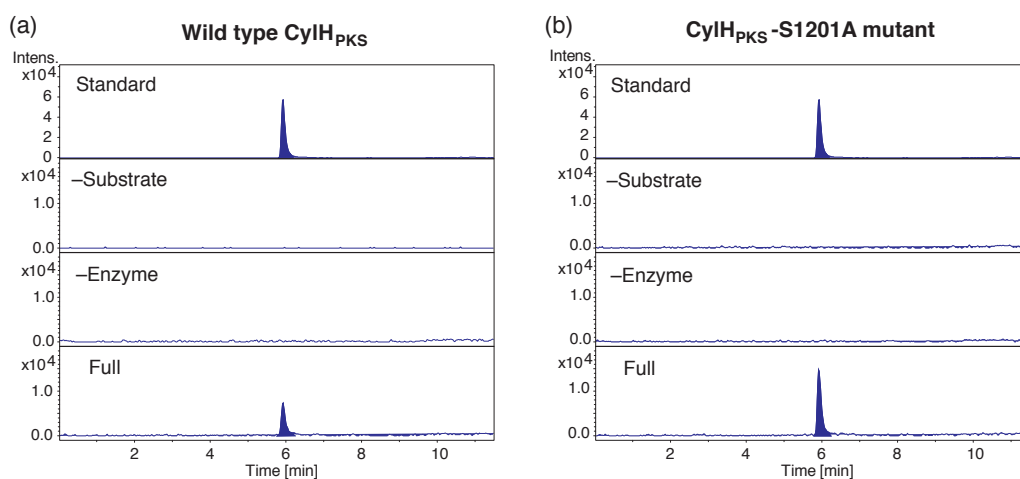

**Figure S6.** LC-MS assay shows that CyIH<sub>PKS</sub> can catalyze the elongation reaction. Hydrolysis product **11** is only observed in the full assay and not in the negative controls for both CyIH<sub>PKS</sub> and CyIH<sub>PKS</sub>-S1201A mutant. (a) Extracted ion chromatogram (EIC) of hydrolysis product **11** in assay with wild type CyIH<sub>PKS</sub>, (b) CyIH<sub>PKS</sub>-S1201A mutant.

**Table S4.** LC-MS analysis of standards for CyIH<sub>PKS</sub> elongation assays.

| Sample                        | Formula                                           | Charge state       | Calculated Mass | Observed Mass | Error (ppm) |
|-------------------------------|---------------------------------------------------|--------------------|-----------------|---------------|-------------|
| Acyl-SNAC substrate <b>10</b> | C <sub>17</sub> H <sub>33</sub> NO <sub>2</sub> S | [M+H] <sup>+</sup> | 316.2305        | 316.2306      | 0.3         |
| Hydrolysis product <b>11</b>  | C <sub>15</sub> H <sub>28</sub> O <sub>3</sub>    | [M-H] <sup>-</sup> | 255.1966        | 255.1963      | -1.2        |

## HPLC assay for CyII resorcinol formation with CylH acyl-ACP substrate

Stock solutions of *holo* CylH<sub>PKS</sub> and *holo* CylH<sub>PKS</sub>-S1201A mutant were prepared prior to the assay by incubating 50  $\mu$ M *apo* CylH<sub>PKS</sub>, 5  $\mu$ M Sfp, 250  $\mu$ M CoA, and 1 mM MgCl<sub>2</sub> in 50 mM potassium phosphate buffer pH 8.0 in 100  $\mu$ L volume for 1 h at room temperature. A typical CyII assay contained 100  $\mu$ M substrate **5**, 20  $\mu$ M *holo* CylH<sub>PKS</sub> (wild type or S1201A mutant), 1.2  $\mu$ M CyII, 500  $\mu$ M malonyl-CoA, and 1 mM EDTA in 100 mM potassium phosphate buffer pH 8.0 in a final assay volume of 100  $\mu$ L. The reaction was incubated at room temperature and 30  $\mu$ L of the reaction was quenched with 60  $\mu$ L of cold acetonitrile after 15 min, 30 min, 1 h, and 2 h. The quenched sample was incubated on ice for 10 min and then centrifuged (13,200 rpm x 10 min at 4 °C). The supernatant was analyzed by HPLC (80  $\mu$ L injection volume) on a Chromolith RP-18e column (4.6 x 100 mm, EMD Millipore) at a flow rate of 1 mL/min and monitoring at 210 nm. The following elution conditions were applied: 20% solvent B in solvent A for 2 min, a gradient increasing to 100% solvent B in solvent A over 15 min, 100% solvent B for 5 min, a gradient decreasing to 20% solvent B in solvent A over 1 min, 20% solvent B in solvent A for 6 min (solvent A = water; solvent B = acetonitrile).

Resorcinol formation is not observed in the absence of CyII, MalonylCoA or substrate **10** (**Fig. S7**). A small amount of resorcinol **8** is formed in the absence of CylH<sub>PKS</sub> due to promiscuous activity of CyII toward substrate **10**. Increasing the ratio of CylH<sub>PKS</sub> to CyII did not change the qualitative rate of resorcinol formation, which implies that the CyII-catalysed resorcinol formation is the rate-limiting step in these assays (data not shown).

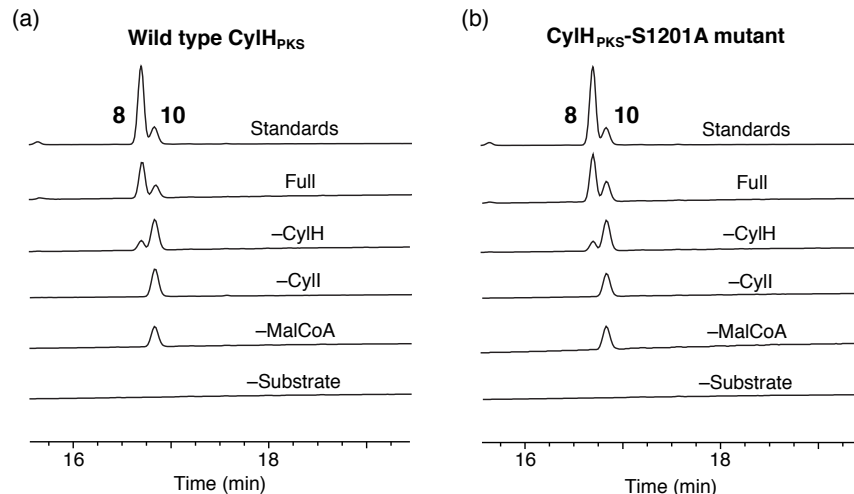

**Figure S7.** HPLC analysis of the full assay and the negative controls of the CyII catalyzed resorcinol **8** formation using CyIH acyl-ACP substrate at 2 h time point. (A) Assays performed with wild type CyIH<sub>PKS</sub>, and (B) assays performed with CyIH<sub>PKS</sub>-S1201A mutant (210 nm).

#### Quantitative LC-MS assay for CyII resorcinol formation with CyIH acyl-ACP substrate

Stock solutions of *holo* CyIH<sub>PKS</sub> and *holo* CyIH<sub>PKS</sub>-S1201A mutant were prepared prior to the assay by incubating 50  $\mu$ M *apo* CyIH<sub>PKS</sub>, 5  $\mu$ M Sfp, 250  $\mu$ M CoA, and 1 mM MgCl<sub>2</sub> in 50 mM potassium phosphate buffer pH 8.0 in 100  $\mu$ L volume for 1 h at room temperature. A typical quantitation assay contained 100  $\mu$ M substrate **10**, 20  $\mu$ M *holo* CyIH<sub>PKS</sub> (wild type or S1201A mutant), 1.2  $\mu$ M CyII, 500  $\mu$ M malonyl-CoA, and 1 mM EDTA in 100 mM potassium phosphate buffer pH 8.0 in a final assay volume of 50  $\mu$ L. The reaction was incubated at room temperature for 2 h, and then 10  $\mu$ L of an internal standard stock solution containing 120  $\mu$ M hydrolysis product internal standard **13** and 120  $\mu$ M *d*<sub>3</sub>-resorcinol **14** was added to each sample (**Fig. S8**). The reaction was quenched with 50  $\mu$ L of cold acetonitrile, and then the quenched sample was incubated overnight at -20  $^{\circ}$ C. The sample was thawed on ice, centrifuged (13,200 rpm x 10 min at 4  $^{\circ}$ C), and analyzed using an Agilent QQQ mass spectrometer in the Small Molecule Mass Spectrometry Facility, Harvard Faculty of Arts and Sciences (FAS) Division of Science.

The UHPLC equipped with a G4220A binary pump, a built-in vacuum degasser and a thermostatted G4226A high performance autosampler was used for the analysis. Calibration standards and samples (4  $\mu$ L injection volume) were analyzed using an ACQUITY<sup>TM</sup> UPLC BEH C<sub>18</sub> analytical column (2.1 x 50 mm, 1.7  $\mu$ m) equipped with a VanGuard BEH C<sub>18</sub> Pre-



column (2.1 x 5 mm, 1.7  $\mu$ m, Waters Corporation) at the flow rate of 0.6 mL/min. The column temperature was maintained at room temperature. The following elution conditions were applied: a gradient increasing from 20 to 65% solvent B in solvent A for 2.91 min, a gradient increasing from 65 to 100% solvent B in solvent A over 1.01 min, 100% solvent B for 3.5 min, a gradient decreasing to 20% solvent B in solvent A over 0.1 min, 20% solvent B for 2.35 min. (solvent A = 5 mM ammonium hydroxide in water; solvent B = 5 mM ammonium hydroxide in acetonitrile).

For the MS detection, the ESI mass spectra data were recorded on a negative ionization mode by MRM. The precursor  $\rightarrow$  product ions MRM transition used for hydrolysis product **11** were  $m/z$  255.19 [M-H]<sup>-</sup>  $\rightarrow$  211.1 [C<sub>14</sub>H<sub>27</sub>O]<sup>-</sup> (fragmentor voltage 115 V, collision energy (CE) = 12 V) as the quantifier and  $m/z$  255.19 [M-H]<sup>-</sup>  $\rightarrow$  57 [C<sub>3</sub>H<sub>5</sub>O]<sup>-</sup> (fragmentor voltage 115 V, CE = 24 V) as the qualifier (**Fig. S9a**); for the hydrolysis product internal standard **13**, they were  $m/z$  213.15 [M-H]<sup>-</sup>  $\rightarrow$  169 [C<sub>11</sub>H<sub>21</sub>O]<sup>-</sup> (fragmentor voltage 110 V, CE = 8 V) as the quantifier and  $m/z$  213.15 [M-H]<sup>-</sup>  $\rightarrow$  153 [C<sub>10</sub>H<sub>17</sub>O]<sup>-</sup> (fragmentor voltage 110 V, CE = 16 V) as the qualifier (**Fig. S9b**); for resorcinol **8** they were  $m/z$  277.22 [M-H]<sup>-</sup>  $\rightarrow$  235.2 [C<sub>16</sub>H<sub>27</sub>O]<sup>-</sup> (fragmentor voltage 155 V, CE = 20 V) as the quantifier and  $m/z$  277.2 [M-H]<sup>-</sup>  $\rightarrow$  121.9 [C<sub>7</sub>H<sub>6</sub>O<sub>2</sub>]<sup>-</sup> (fragmentor voltage 155 V, CE = 24 V) as the qualifier (**Fig. S9c**); for *d*<sub>3</sub>-resorcinol **14** they were  $m/z$  280.24 [M-H]<sup>-</sup>  $\rightarrow$  238.2 [C<sub>16</sub>H<sub>24</sub>D<sub>3</sub>O]<sup>-</sup> (fragmentor voltage 155 V, CE = 20 V) as the quantifier and  $m/z$  277.2 [M-H]<sup>-</sup>  $\rightarrow$  121.9 [C<sub>7</sub>H<sub>6</sub>O<sub>2</sub>]<sup>-</sup> (fragmentor voltage 155 V, CE = 24 V) as the qualifier (**Fig. S9d**). Nitrogen was used as the drying, sheath, and collision gas. All the source and analyzer parameters were optimized using Agilent MassHunter Source and iFunnel Optimizer and Optimizer software, respectively. The source parameters are as follows: drying gas temperature 320 °C, drying gas flow 13 L/min, nebulizer pressure 45 psi, sheath gas temperature 300 °C, sheath gas flow 11 L/min, capillary voltage 3000 V, and nozzle voltage 0 V. The UHPLC eluant before 0.5 min was diverted to waste.

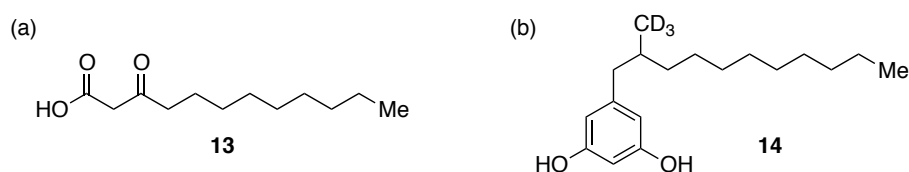

**Figure S8.** Structures of internal standards used for the LC-MS quantitation assay. (a) Structure of hydrolysis product internal standard **13** and (b) *d*<sub>3</sub>-resorcinol **14**.

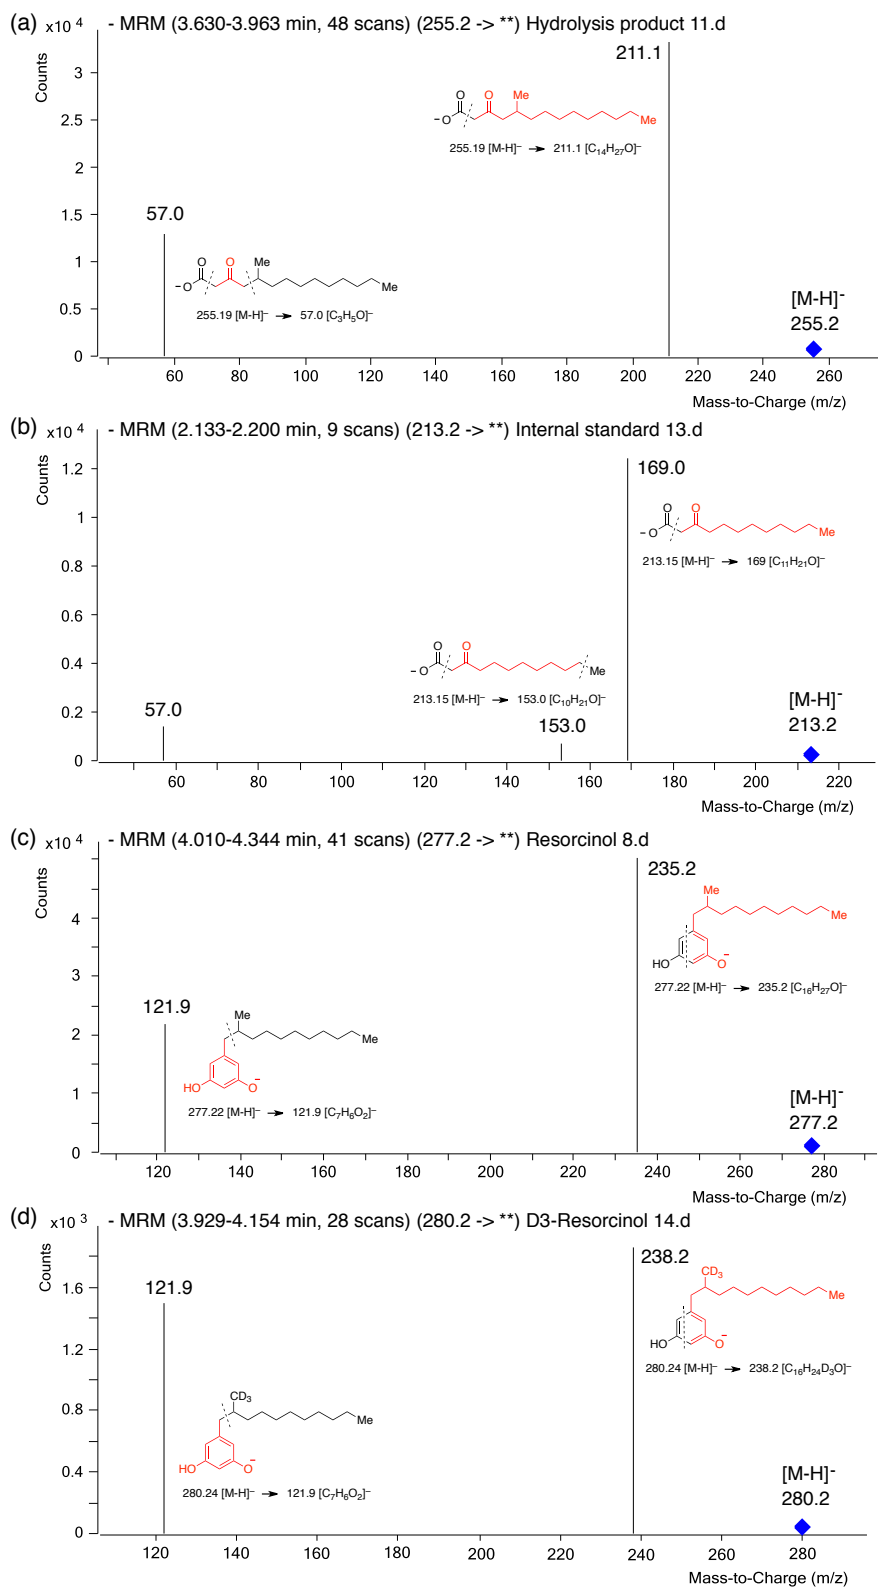

**Figure S9.** MRM transitions monitored in quantitative LC-MS. (a) MRM transitions of hydrolysis product **10**, (b) internal standard **13**, (c) resorcinol **8**, and (d)  $d_3$ -resorcinol **14**.

#### 4. Biochemical characterization of CylH<sub>TE</sub> and CylH<sub>TE</sub>-S95A mutant

##### HPLC assay for CylI resorcinol formation in presence of CylH<sub>TE</sub>

A typical assay contained 100  $\mu$ M substrate **9**, 10  $\mu$ M of CylH<sub>TE</sub> (wild type or S95A mutant), 1.2  $\mu$ M CylI, 250  $\mu$ M malonyl-CoA, and 1 mM EDTA in 100 mM potassium phosphate buffer pH 8.0 in a final assay volume of 100  $\mu$ L. The reaction was incubated at room temperature and a 30  $\mu$ L reaction aliquot was quenched with 60  $\mu$ L of cold acetonitrile after 5 min, 10 min, 15 min, 30 min, 1 h, and 2 h. The quenched sample was incubated on ice for 10 min and centrifuged (13,200 rpm x 10 min at 4  $^{\circ}$ C). Supernatant was analyzed by HPLC (80  $\mu$ L injection volume) on a Chromolith RP-18e column (4.6 x 100 mm, EMD Millipore) at a flow rate of 1 mL/min. The following elution conditions were applied: 20% solvent B in solvent A for 2 min, a gradient increasing to 100% solvent B in solvent A over 15 min, 100% solvent B for 5 min, a gradient decreasing to 20% solvent B in solvent A over 1 min, 20% solvent B in solvent A for 6 min (solvent A = water; solvent B = acetonitrile).

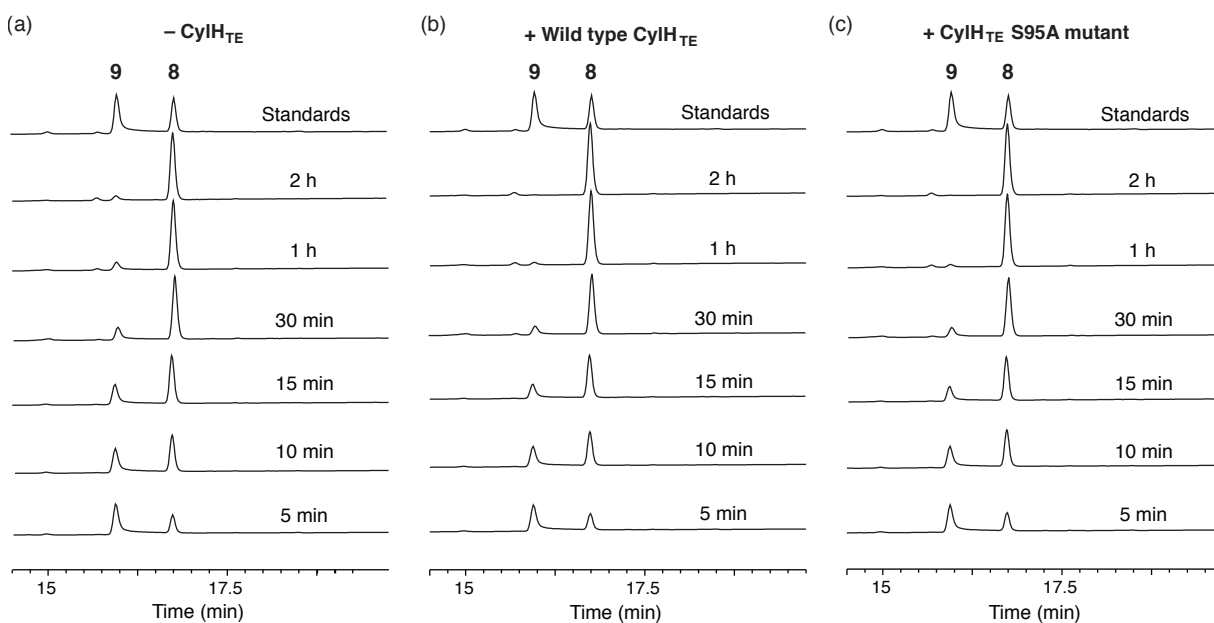

**Figure S10.** HPLC analysis of CylI-catalyzed resorcinol formation with or without CylH<sub>TE</sub> shows that the rate of reaction does not appear to be impacted by the presence of the CylH<sub>TE</sub> (monitored at 230 nm). (a) Time course of resorcinol formation in the absence of CylH<sub>TE</sub>, (b) in the presence of wild type CylH<sub>TE</sub> and (c) in the presence of CylH<sub>TE</sub> S95A mutant.

## Spectrophotometric assay for the hydrolysis activity of CylH<sub>TE</sub>

A continuous spectrophotometric assay using dithionitrobenzoic acid (DTNB) reduction to thionitrobenzoic acid was employed to monitor generation of free thiol after thioester hydrolysis. Each assay contained 50 mM tris•HCl buffer pH 8, 50 mM NaCl, 2 mM DTNB, 50  $\mu$ M EDTA, 2  $\mu$ M enzyme (CylH<sub>TE</sub>, CylH<sub>TE</sub>-S95A mutant, or TycF), and acetyl-SNAC (0.1 mM, 0.5 mM, 1 mM, 2.5 mM, 5 mM, or 10 mM) in a final volume of 100  $\mu$ L. The reaction was initiated by adding acetyl-SNAC and monitored at 412 nm by Spectramax i3 Plate Reader. Michaelis-Menten kinetics were calculated employing the value  $\epsilon = 14,140 \text{ M}^{-1}\text{cm}^{-1}$  and plotted (**Fig. S11**). The mean  $\pm$  SEM values of the kinetic parameters are shown in **Table S5**. The signal due to background hydrolysis of acetyl-SNAC was taken into consideration by subtracting the averaged signal of the negative controls lacking an enzyme performed in triplicate.

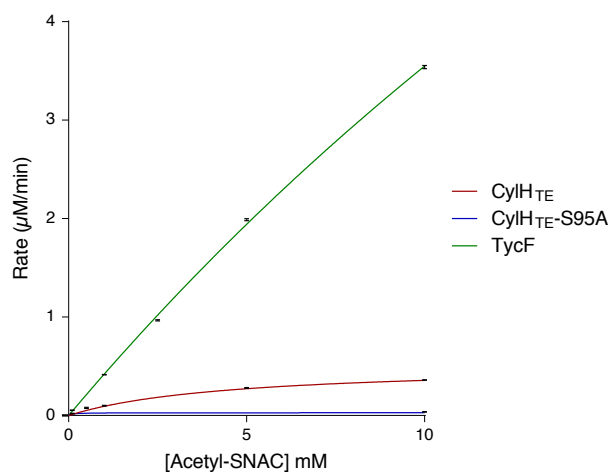

**Figure S11.** Michaelis-Menten analysis of the spectrophotometric assay shows that wild type CylH<sub>TE</sub> hydrolyses acetyl-SNAC, while CylH<sub>TE</sub>-S95A mutant is inactive. Data points represent the average of results from triplicate reactions with standard error bars.

**Table S5.** Kinetic parameters of CylH<sub>TE</sub> and TycF thioesterase activity on acetyl-SNAC.

| Enzyme                   | K <sub>m</sub> (mM) | k <sub>cat</sub> (min <sup>-1</sup> ) | k <sub>cat</sub> /K <sub>m</sub> (M <sup>-1</sup> s <sup>-1</sup> ) |
|--------------------------|---------------------|---------------------------------------|---------------------------------------------------------------------|
| CylH <sub>TE</sub>       | 4.5 $\pm$ 1.7       | 0.26 $\pm$ 0.04                       | 1.0 $\pm$ 0.4                                                       |
| CylH <sub>TE</sub> -S95A | N/A                 | N/A                                   | N/A                                                                 |
| TycF                     | 47.9 $\pm$ 9.7      | 10.28 $\pm$ 1.78                      | 3.6 $\pm$ 1.0                                                       |

## Assessment of the substrate scope of CylH<sub>TE</sub>

A continuous spectrophotometric assay using dithionitrobenzoic acid (DTNB) reduction to thionitrobenzoic acid was employed to monitor generation of free thiol after thioester hydrolysis. Each assay contained 50 mM tris•HCl buffer pH 8, 50 mM NaCl, 2 mM DTNB, 50  $\mu$ M EDTA, 2  $\mu$ M CylH<sub>TE</sub> and acyl-SNAC (0.1 mM, 0.5 mM, 1 mM, 2.5 mM, 5 mM, or 10 mM) in a final volume of 100  $\mu$ L. The reaction was initiated by adding acyl-SNAC and monitored at 412 nm by Spectramax i3 Plate Reader. Michaelis-Menten kinetics were calculated employing the value  $\epsilon = 14,140 \text{ M}^{-1}\text{cm}^{-1}$  and plotted (**Fig. S12**). For the hexanoyl-SNAC assay, which did not follow Michaelis-Menten kinetics, the  $k_{\text{cat}}/K_M$  value was calculated from the linear slope of the plot at low substrate concentration. The mean  $\pm$  SEM values of the kinetic parameters are shown in **Table S6**. The signal due to background hydrolysis of acyl-SNAC was taken into consideration by subtracting the averaged signal of the negative controls with CylH<sub>TE</sub>-S95A mutant performed in duplicate.

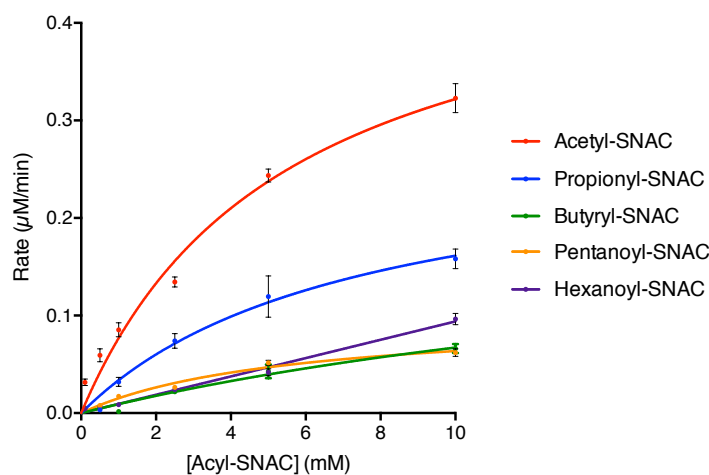

**Figure S12.** Michaelis-Menten analysis of the spectrophotometric assay shows that wild type CylH<sub>TE</sub> has greater activity for acyl-SNAC substrates with shorter chain length (acetyl- and propionyl-SNACs). Data points represent the average of results from duplicate reactions with standard error bars.

**Table S6.** Kinetic parameters of CylH<sub>TE</sub> activity on other short chain acyl-SNAC.

| <b>Substrate</b> | <b>K<sub>m</sub> (mM)</b> | <b>k<sub>cat</sub> (min<sup>-1</sup>)</b> | <b>k<sub>cat</sub>/K<sub>m</sub> (M<sup>-1</sup>s<sup>-1</sup>)</b> |
|------------------|---------------------------|-------------------------------------------|---------------------------------------------------------------------|
| Propionyl-SNAC   | 7.3 ± 2.5                 | 0.14 ± 0.03                               | 0.32 ± 0.12                                                         |
| Butyryl-SNAC     | 23.1 ± 17.9               | 0.11 ± 0.06                               | 0.08 ± 0.08                                                         |
| Pentanoyl-SNAC   | 5.5 ± 1.8                 | 0.05 ± 0.01                               | 0.15 ± 0.05                                                         |
| Hexanoyl-SNAC    | N/A                       | N/A                                       | 0.08 ± 0.01                                                         |

## **5. Gel autoradiography assay of wild type CylH<sub>PKS</sub> and CylH<sub>PKS</sub>-S1201A mutant using [Acetyl-1-<sup>14</sup>C]-Coenzyme A**

<sup>14</sup>C-Acetyl-ACP was generated by activation with [acetyl-1-<sup>14</sup>C]-CoA using the phosphopantetheinyl transferase Sfp. A typical assay contained 10 μM CylH<sub>PKS</sub> (wild type or S1201A mutant), 8 μM Sfp, 50 μM <sup>14</sup>C-acetyl-CoA (6.25 nCi), 1 mM MgCl<sub>2</sub>, and 1 mM TCEP in 50 mM potassium phosphate buffer pH 8. The assay was initiated by addition of <sup>14</sup>C-acetyl-CoA and incubated at room temperature. After 15 min, 30 min, 1 h, and 2 h, a 10 μL reaction aliquot was removed and quenched by dilution into 10 μL of 2x SDS-loading buffer (no DTT or β-mercaptoethanol added). The quenched samples were heated at ~90 °C for 10 min and then 10 μL of each sample was run on a SDS-PAGE gel (4-15% Mini-PROTEAN TGX precast gel). The gel was washed with water, stained with Coomassie, destained, dried using a gel dryer (Labconco), and then visualized by phosphorimaging (GE Typhoon Imager, FAS Center for Systems Biology). Reactions with CylH<sub>PKS</sub>-S1201A mutant or no Sfp were used as negative controls. DTT and β-mercaptoethanol reducing agents were excluded from the loading dye since they are known to cleave acyl-ACP species.<sup>9</sup>

## **6. Bioinformatics of the CylH TE domain and other thioesterases**

### **Multiple sequence alignment of the CylH TE domain with other thioesterases**

52 amino acid sequences of type I and type II thioesterases from various PKS, NRPS, and hybrid PKS/NRPS biosynthetic systems were obtained from the NCBI public database (**Table S7**),<sup>10</sup> and the domain boundaries were determined using PKS/NRPS Analysis Web Server.<sup>11</sup> Multiple sequence alignment for the phylogenetic tree was performed by MUSCLE alignment using Geneious Pro Version 7.1.6.<sup>5</sup>

**Table S7.** Amino acid sequences of the TEs used in the MSA and the phylogenetic tree.

| Thioesterase                                         | Accession number | Thioesterase                           | Accession number |
|------------------------------------------------------|------------------|----------------------------------------|------------------|
| C-1027_TEII_P                                        | 4I4J_A           | Legioliulin_TEI_P                      | AIU36104         |
| Calicheamycin_TEII_P                                 | AAM94793         | G. violaceus_TEI_P                     | WP_011141939     |
| Bacitracin_TEI_N                                     | O68008           | C. acetobutylicum_TEII_uk              | WP_010964340     |
| Lichenysin_TEI_N                                     | CAA06325         | Gramicidin_TEII_N_<br>B.pseudomycoides | WP_006096422     |
| Surfactin_TEI_N                                      | IJMK_C           | Cylindrocyclophane_TEI_P               | AFV96142         |
| Tyrocidine_TEI_N                                     | O30409           | M. aeruginosa_TEI_P                    | WP_024970096     |
| Fengycin_TEI_N                                       | AAB00093         | Gramicidin_TEII_N_<br>A. migulans      | P14686           |
| Fusaricidin_TEI_N                                    | ABQ96384         | Microcystein_TEII_N                    | ACA83967         |
| Mycosubtilin_TEI_N                                   | Q9R9I9           | A. variabilis_TEII_uk                  | WP_011321392     |
| Bacillorin_TEI_N                                     | WP_007410142     | Soraphen_TEI_P                         | AAA79984         |
| Iturin_TEI_N                                         | ABY89500         | Amphotericin_TEI_P                     | AAK73503         |
| B. pseudomallei_TEI-1_PN<br>B. pseudomallei_TEI-2_PN | WP_009967664     | Lasalocid_TEI_P                        | BAG85032         |
| FmoA5_TEI-1_N<br>FmoA5_TEI-2_N                       | BAP16699         | Spinosyn_TEI_P                         | AAG23262         |
| Tyrocidine_TEII_N                                    | WP_0158910190    | Spirangien_TEI_P                       | CAD43451         |
| Bacitracin_TEII_N                                    | WP_020452080     | Avermectin_TEI_P                       | WP_010982381     |
| DEBS_TEII_P                                          | CAA42028         | Pikromycin_TEI_P                       | AAC69332         |
| Megalomicin_TEII_P                                   | AAG13923         | DEBS_TEI_P                             | WP_011873139     |
| Pikromycin_TEII_P                                    | AAC69333         | Disorazol_TEI_PN                       | CAI43932         |
| ScoT_TEII_P                                          | WP_003972638     | Melithiazol_TEI_PN                     | CAD89778         |
| Borrelidin_TEII_P                                    | WP_019330222     | Myxothiazol_TEI_PN                     | AAF19815         |
| Tylosin_TEII_P                                       | KDS84464         | DKxanthene_TEI_PN                      | WP_011554299     |
| Kendomycin_TEII_P                                    | CAQ52621         | Tubulysin_TEI_PN                       | CAF05651         |
| Rifamycin_TEII_P                                     | AAG52991         | Chondramid_TEI_PN                      | Q0VZ70           |
| Jerangolid_TEI_P                                     | ABK32291         | Cryptophycin_TEI_PN                    | ABM21572         |
| Ajudazol_TEI_PN                                      | CAQ18835         | Hectochlorin_TEI_PN                    | AAV42398         |

Abbreviations: TEI = type I TE, TEII = type II TE, P = from PKS assembly lines, N = from NRPS assembly lines, PN = from PKS-NRPS hybrid assembly lines, uk = unknown.



## **Generation of homology model using HHpred**

CylH TE domain was used as the query to search for structural homologs using HHpred.<sup>12</sup> The two highest hits were known type II TEs from rifamycin and prodiginine biosynthetic pathways (RifR<sup>13</sup> and RedJ,<sup>14</sup> respectively). A homology model of the CylH TE domain was generated by Modeller<sup>15</sup> using the crystal structure of RifR as a template and the resulting PDB file was aligned with the RifR PDB file (3FLA) using MacPyMOL version 1.7.<sup>16</sup>

## **Construction of phylogenetic tree**

52 amino acid sequences were aligned by MUSCLE, and phylogenetic trees were created using MrBayes<sup>17</sup> provided by Geneious Pro Version 7.1.6<sup>5</sup> following a method described in the study of the TE domain in the ajudazole biosynthetic pathway.<sup>18</sup> The Bayesian inference method used the Poisson process with an outgroup set as a type II thioesterase C-1027 from the enediyne polyketide biosynthetic pathway, which has a hotdog fold unlike other TEIs and TEIs.<sup>19</sup> Markov chain Monte Carlo analysis (MCMC) was performed with 1.1 million generations and four independent chains, and the Markov chain was sampled every 200 generations.

## **BLAST searches for other TE domains with sequence homology to type II TEs**

The CylH TE domain amino acid sequence was used as the query for a BLASTp search on NCBI.<sup>10</sup> Any protein hits with lengths shorter than 300 amino acids were removed to eliminate freestanding type II thioesterases from the search results. The search results were manually curated to remove hits that appeared to be identical from the organisms that have multiple protein sequences in the NCBI database. All the hits that did not appear to be type I PKSs or NRPSs were removed from the search results to give 84 unique hits (**Table S8**). The domain organization of each protein hit was determined using the Conserved Domain on NCBI and the PKS/NRPS Analysis tool.<sup>10</sup> Protein hits with an E value greater than 1 E-10 were removed from the list, and the TE domain hits were confirmed to have higher homology to type II TEs by phylogenetic analysis using the Mr. Bayes tool and multiple sequence alignment using the MUSCLE alignment tool on Geneious.<sup>11</sup>

**Table S8.** BLASTp search result for type II TE-like domains on type I PKS and NRPS enzymes.

| #  | Organism                                                             | Accession number | Length (aa) | Annotated function       | Domain organization              | E value   |
|----|----------------------------------------------------------------------|------------------|-------------|--------------------------|----------------------------------|-----------|
| 1  | <i>Cylindrospermum stagnale</i>                                      | WP_015207397.1   | 2241        | PKS                      | ECH-ER-KS-AT-T-TE                | 1.40E-163 |
| 2  | <i>Pleurocapsa</i> sp. PCC 7319                                      | WP_019504305.1   | 1593        | PKS                      | KS-AT-DH-T-TE                    | 1.87E-77  |
| 3  | <i>Cyanothece</i> sp. PCC 7424                                       | WP_015954747.1   | 1337        | PKS                      | KS-AT-T-TE                       | 4.42E-76  |
| 4  | <i>Gloeocapsa</i> sp. PCC 73106                                      | WP_006530113.1   | 1316        | PKS                      | KS-AT-T-TE                       | 1.14E-74  |
| 5  | <i>Chlorogloeopsis fritschii</i>                                     | WP_016872856.1   | 1281        | PKS                      | KS-AT-T-TE                       | 4.46E-73  |
| 6  | <i>Microcystis aeruginosa</i>                                        | WP_002776857.1   | 1320        | PKS                      | KS-AT-T-TE                       | 9.33E-61  |
| 7  | <i>Cylindrospermum stagnale</i>                                      | WP_015328279.1   | 2172        | PKS                      | KS-AT-MT-KR-T-TE                 | 1.47E-51  |
| 8  | <i>Kamptonema</i> (multispecies)                                     | WP_007358014.1   | 1312        | PKS                      | KS-AT-T-TE                       | 1.79E-49  |
| 9  | <i>Burkholderia glumae</i>                                           | WP_012732747.1   | 2381        | PKS                      | KS-AT-DH-EH-KR-T-TE              | 6.15E-48  |
| 10 | <i>Paenibacillus alvei</i>                                           | WP_005550795.1   | 1815        | NRPS                     | C-A-T-E-TE                       | 9.76E-48  |
| 11 | <i>Stigmatella aurantiaca</i>                                        | WP_013375988.1   | 2092        | PKS                      | KS-AT-DH-KR-T-TE                 | 4.43E-44  |
| 12 | <i>Chondromyces crocatus</i>                                         | CAQ18835.1       | 1620        | AjuH (PKS) <sup>18</sup> | KS-AT-DH-T-TE                    | 3.81E-43  |
| 13 | <i>Mesorhizobium amorphae</i>                                        | WP_006199852.1   | 1488        | PKS                      | TE-A-T-KS-AT                     | 1.00E-42  |
| 14 | <i>Gloeobacter violaceus</i>                                         | WP_011141939.1   | 963         | PKS                      | KS-T-TE                          | 1.61E-41  |
| 15 | <i>Sorangium cellulosum</i>                                          | ABK32291.1       | 2869        | JerE (PKS) <sup>18</sup> | KS-AT-KR-T-KS-AT-T-TE            | 2.92E-41  |
| 16 | <i>Trichodesmium erythraeum</i>                                      | WP_011613196.1   | 1354        | PKS                      | KS-AT-T-TE                       | 3.85E-41  |
| 17 | <i>Mesorhizobium</i> sp. L48C026A00                                  | WP_023803946.1   | 1920        | PKS                      | TE-A-T-KS-AT-T                   | 6.61E-41  |
| 18 | <i>Sorangium cellulosum</i>                                          | CCE88378.1       | 2453        | PKS                      | KS-AT-DH-ER-KR-T-TE              | 3.49E-40  |
| 19 | <i>Candidatus Magnetoglobus multicellularis</i> str. <i>Araruama</i> | ETR71534.1       | 1348        | PKS                      | KS-DH-T-TE                       | 7.53E-38  |
| 20 | <i>Clostridium pasteurianum</i>                                      | WP_023973746.1   | 1502        | PKS                      | KS-AT-DH-T-TE                    | 3.31E-37  |
| 21 | <i>Rhizobium sullae</i>                                              | WP_027513632.1   | 1773        | PKS                      | KS-AT-KR-T-TE                    | 1.06E-36  |
| 22 | <i>Pseudomonas corrugata</i>                                         | WP_024779985.1   | 1787        | PKS                      | KS-AT-KR-T-TE                    | 5.00E-36  |
| 23 | <i>Chondromyces apiculatus</i> DSM 436                               | EYF05476.1       | 4240        | PKS                      | KS-AT-T-KS-AT-KR-T-KS-AT-DH-T-TE | 2.88E-35  |
| 24 | <i>Sinorhizobium arboris</i>                                         | WP_028001517.1   | 1768        | PKS                      | KS-AT-KR-T-TE                    | 3.20E-35  |

|    |                                                         |                |      |          |                         |          |
|----|---------------------------------------------------------|----------------|------|----------|-------------------------|----------|
| 25 | <i>Cyanothece</i> sp.<br>ATCC 51142                     | WP_012362254.1 | 1285 | PKS      | KS-AT-T-TE              | 1.42E-34 |
| 26 | <i>Bacillus cereus</i>                                  | WP_002107075.1 | 1531 | PKS      | KS-AT-DH-T-TE           | 3.19E-34 |
| 27 | <i>Clostridium</i> sp.<br>CAG:411                       | WP_022438322.1 | 2203 | PKS-NRPS | TE-A-KR-T-SDR           | 2.83E-33 |
| 28 | <i>Legionella</i><br><i>cherryi</i>                     | WP_028380815.1 | 1293 | PKS      | KS-DH-T-TE              | 5.58E-33 |
| 29 | <i>Streptomyces</i><br><i>longisporoflavus</i>          | ACR50795.1     | 1502 | PKS      | KS-AT-DH-T-TE           | 1.23E-31 |
| 30 | <i>Mesorhizobium</i><br><i>ciceri</i>                   | WP_027038666.1 | 1758 | PKS      | KS-AT-KR-T-TE           | 9.68E-31 |
| 31 | <i>Streptomyces</i><br><i>mobaraensis</i>               | WP_004946356.1 | 2674 | PKS/NRPS | TE-A-T-KS-AT-TE-KR-T    | 1.60E-30 |
| 32 | <i>Magnetospirillum</i><br>sp. SO-1                     | WP_008618542.1 | 2056 | PKS      | KS-AT-DH-KR-T-TE        | 3.58E-30 |
| 33 | <i>Coralloccoccus</i><br><i>coralloides</i>             | WP_014397901.1 | 1359 | PKS      | DH-ER-KR-T-TE           | 6.46E-30 |
| 34 | <i>Burkholderia</i> sp.<br>UYPR1.413                    | WP_028371022.1 | 2062 | PKS      | KS-AT-DH-KR-T-TE        | 6.93E-30 |
| 35 | <i>Nocardia</i> sp.<br>BMG51109                         | WP_024805020.1 | 2730 | PKS      | KS-AT-DH-MT-ER-KR-T-TE  | 1.02E-29 |
| 36 | <i>Bradyrhizobium</i><br><i>japonicum</i>               | WP_028153765.1 | 2060 | PKS      | KS-AT-DH-KR-T-TE        | 1.49E-29 |
| 37 | <i>Streptomyces</i> sp.<br>CNQ329                       | WP_027770067.1 | 1499 | PKS      | KS-DH-T-TE              | 1.76E-28 |
| 38 | <i>Mesorhizobium loti</i>                               | WP_010915895.1 | 1780 | PKS      | KS-AT-KR-T-TE           | 3.99E-28 |
| 39 | <i>Branchiostoma</i><br><i>floridae</i>                 | XP_002598380.1 | 3473 | PKS/NRPS | KS-AT-DH-ER-KR-T-TE-C-A | 6.23E-28 |
| 40 | <i>Pseudomonas</i><br><i>aeruginosa</i>                 | WP_023124984.1 | 1392 | NRPS     | A-MT-T-C-T-TE           | 1.02E-27 |
| 41 | <i>Streptomyces</i> sp.<br>NRRL 11266                   | BAE93739.1     | 1508 | PKS      | KS-DH-T-TE              | 1.43E-27 |
| 42 | <i>Burkholderia</i><br><i>pseudomallei</i>              | WP_024430902.1 | 2832 | PKS/NRPS | TE-A-T-KS-AT-TE-KR-T    | 2.75E-27 |
| 43 | <i>Burkholderia</i><br><i>mallei</i>                    | WP_004195624.1 | 2366 | PKS/NRPS | TE-A-T-KS-AT-TE         | 2.77E-27 |
| 44 | <i>Paenibacillus</i> sp.<br>OSY-SE                      | WP_019419387.1 | 1660 | PKS      | KS-AT-DH-T-TE           | 6.47E-27 |
| 45 | <i>Azospirillum</i><br><i>lipoferum</i>                 | WP_012978027.1 | 2157 | PKS      | KS-AT-DH-KS-T-TE        | 9.99E-27 |
| 46 | <i>Fulvivirga</i><br><i>imtechensis</i>                 | WP_009578358.1 | 1986 | PKS      | KS-AT-DH-KR-T-TE        | 2.23E-26 |
| 47 | <i>Ornithinibacillus</i><br><i>scapharcae</i>           | WP_010094403.1 | 1319 | PKS      | KS-AT-DH-T-TE           | 3.19E-26 |
| 48 | <i>Yersinia rohdei</i>                                  | WP_004716672.1 | 1966 | PKS      | KS-AT-DH-ER-KR-T-TE     | 4.03E-26 |
| 49 | <i>Bradyrhizobium</i><br><i>japonicum</i> SEMIA<br>5079 | AHY53341.1     | 2299 | PKS      | KS-AT-DH-KR-T-T-TE      | 4.31E-26 |
| 50 | <i>Mesorhizobium</i> sp.<br>WSM3224                     | WP_027170255.1 | 1843 | PKS/NRPS | TE-A-T-KS-AT-T          | 5.53E-26 |
| 51 | <i>Bacillus</i><br><i>amyloliquefaciens</i><br>SQR9     | AHZ14674.1     | 1632 | PKS      | KS-AT-DH-T-TE           | 1.07E-25 |
| 52 | <i>Burkholderia</i><br><i>thailandensis</i>             | WP_011401503.1 | 2792 | PKS/NRPS | TE-A-T-KS-AT-TE-KR-T    | 1.30E-25 |

|    |                                               |                |       |                                    |                                                                                                                                    |                      |
|----|-----------------------------------------------|----------------|-------|------------------------------------|------------------------------------------------------------------------------------------------------------------------------------|----------------------|
| 53 | <i>Nocardioopsis chromatogenes</i>            | WP_026123546.1 | 2674  | PKS                                | TE-A-T-KS-AT-TE-KR-T                                                                                                               | 1.47E-25             |
| 54 | Uncultured bacterium psy1                     | ADA82585.1     | 12645 | PKS/NRPS                           | KS-MT-T-C-A-T-KS-KR-T-KS-KR-MT-T-KS-DH-KR-T-KS-KR-MT-T-KS-KR-T-KS-MT-T-KS-T-KS-DH-T-TE                                             | 1.75E-25             |
| 55 | <i>Branchiostoma floridae</i>                 | XP_002610053.1 | 3311  | PKS                                | KS-AT-DH-KR-T-TE-C                                                                                                                 | 2.62E-25             |
| 56 | <i>Burkholderia oklahomensis</i>              | WP_010117951.1 | 1596  | PKS/NRPS                           | TE-A-T-KS-AT                                                                                                                       | 4.63E-25             |
| 57 | <i>Branchiostoma floridae</i>                 | XP_002613499.1 | 1705  | PKS/NRPS                           | KR-T-TE-C-A                                                                                                                        | 6.50E-25             |
| 58 | <i>Branchiostoma floridae</i>                 | XP_002598386.1 | 3458  | PKS/NRPS                           | KS-AT-DH-ER-KR-T-TE-C-A                                                                                                            | 9.03E-25             |
| 59 | <i>Chondromyces apiculatus</i> DSM 436        | EYF04558.1     | 1153  | PKS                                | KS-DH-T-TE                                                                                                                         | 5.47E-24             |
| 60 | <i>Burkholderia thailandensis</i>             | WP_009908075.1 | 1559  | PKS/NRPS                           | TE-A-T-KS-AT                                                                                                                       | 9.36E-23             |
| 61 | <i>Hahella ganghwensis</i>                    | WP_020406515.1 | 2382  | PKS                                | FAAL-KS-AT-KR-T-TE                                                                                                                 | 9.67E-23             |
| 62 | <i>Coccomyxa subellipsoidea</i> C-169         | XP_005650993.1 | 15797 | PKS                                | KS-MT-MT-MT-MT-T-T-T-T-T-KS-KR-T-T-KS-DH-ER-KR-T-T-KS-KR-T-KS-KR-T-T-T-KS-KR-T-T-KS-KR-T-KS-DH-KR-T-T-KS-DH-KR-T-T-KS-KR-T-TE-T-TE | 1.73E-22<br>2.03E-22 |
| 63 | <i>Propionibacterium propionicum</i>          | WP_014846098.1 | 1536  | PKS                                | KS-AT-DH-T-TE                                                                                                                      | 1.67E-21             |
| 64 | <i>Vibrio caribbenthicus</i>                  | WP_009601858.1 | 1072  | NRPS                               | A-T-TE                                                                                                                             | 2.16E-21             |
| 65 | <i>Yersinia kristensenii</i>                  | WP_004388876.1 | 2392  | PKS                                | KS-AT-DH-ER-KR-T-TE                                                                                                                | 3.35E-21             |
| 66 | <i>Streptomyces</i> sp. A7248                 | AFS33452.1     | 1641  | Sial (PKS) <sup>20</sup>           | KS-AT-DH-T-TE                                                                                                                      | 1.06E-20             |
| 67 | <i>Trichophyton interdigitale</i> MR816       | KDB25511.1     | 2403  | PKS                                | KS-AT-DH-ER-KR-T-TE                                                                                                                | 3.86E-20             |
| 68 | <i>Mycobacterium tuberculosis</i> TKK_03_0022 | KCD30187.1     | 881   | NRPS                               | A-T-TE                                                                                                                             | 6.35E-20             |
| 69 | <i>Mycobacterium tuberculosis</i> MAL010108   | KBG75468.1     | 1414  | Phenyloxazole synthase MbtB (NRPS) | T-Cy-A-T-TE                                                                                                                        | 7.03E-20             |
| 70 | <i>Mycobacterium bovis</i>                    | WP_024458669.1 | 991   | NRPS                               | A-T-TE                                                                                                                             | 1.06E-19             |
| 71 | <i>Mycobacterium tuberculosis</i>             | WP_003901388.1 | 1280  | NRPS                               | C-A-T-TE                                                                                                                           | 1.53E-19             |
| 72 | <i>Mycobacterium bovis</i>                    | WP_019283915.1 | 1414  | NRPS                               | C-A-T-TE                                                                                                                           | 2.02E-19             |
| 73 | <i>Arthroderma gypseum</i> CBS 118893         | XP_003175627.1 | 2406  | PKS                                | KS-AT-DH-ER-KR-T-TE                                                                                                                | 2.33E-19             |
| 74 | <i>Mycobacterium abscessus</i>                | WP_025239395.1 | 1257  | PKS                                | TE-KS-AT-T                                                                                                                         | 1.07E-18             |

|    |                                      |                |      |                                                    |                                                             |          |
|----|--------------------------------------|----------------|------|----------------------------------------------------|-------------------------------------------------------------|----------|
| 75 | <i>Streptomyces fungicidicus</i>     | ABD65958.1     | 8986 | Enduracidin biosynthesis EndC (NRPS) <sup>21</sup> | C-A-T-C-A-T-C-A-T-C-A-T-C-A-T-C-A-T-C-A-T-C-A-T-C-A-T-TE-TE | 3.45E-18 |
| 76 | <i>Saccoglossus kowalevskii</i>      | XP_006823210.1 | 2198 | PKS                                                | AT-DH-ER-KR-T-TE                                            | 7.60E-18 |
| 77 | <i>Segniliparus rotundus</i>         | WP_013139326.1 | 1274 | PKS                                                | TE-KS-AT-T                                                  | 2.48E-17 |
| 78 | <i>Emiliania huxleyi</i> CCMP1516    | XP_005790240.1 | 2677 | PKS/NRPS                                           | TE-A-T-KS-AT-TE-KR-T                                        | 1.88E-14 |
| 79 | <i>Fusarium oxysporum</i> FOSC 3-a   | EWY85877.1     | 2372 | PKS                                                | KS-AT-DH-ER-KR-T-TE                                         | 2.34E-14 |
| 80 | <i>Strongylocentrotus purpuratus</i> | NP_001239013.1 | 2606 | PKS                                                | KS-AT-DH-ER-KR-T-TE                                         | 4.20E-14 |
| 81 | <i>Phytophthora parasitica</i>       | ETL32105.1     | 1311 | NRPS                                               | TE-A-T-Re                                                   | 6.40E-14 |
| 82 | <i>Nannochloropsis gaditana</i>      | EWM26301.1     | 2887 | PKS                                                | KS-AT-DH-ER-KR-T-TE                                         | 6.02E-13 |
| 83 | <i>Phytophthora infestans</i> T30-4  | XP_002905400.1 | 1311 | NRPS                                               | TE-A-T-Re                                                   | 6.73E-12 |
| 84 | <i>Sorangium cellulosum</i>          | ABK32263.1     | 1773 | AmbH (PKS) <sup>22</sup>                           | KS-AT-KR-T-TE                                               | 1.28E-10 |

The results are ordered by E-value. Protein sequences from previously reported biosynthetic pathways are highlighted in green.

## 7. Chemical synthesis procedures and characterization data

The acetyl-SNAC used in the spectrophotometric assay for thioesterase activity was prepared following the previously reported synthesis.<sup>23</sup>

### Synthesis of CylH acyl-SNAC substrate (**10**)

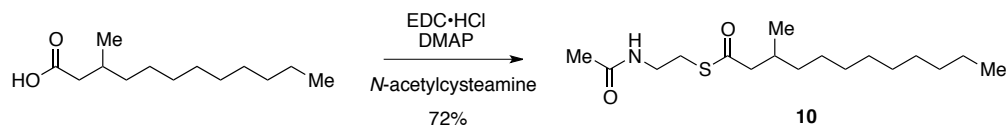

3-Methyldodecanoic acid was prepared following the previously reported synthesis.<sup>3</sup>

### *S*-(2-acetamidoethyl)-3-methyldodecanethioate (**10**)

EDC·HCl (89 mg, 0.467 mmol) was added to a solution of 3-methyldodecanoic acid (50 mg, 0.233 mmol) in dichloromethane (2.5 mL) under argon cooled to 0 °C. The mixture was stirred at 0 °C for 20 min, and then *N*-acetylcysteamine (0.030 mL, 0.280 mmol) and 4-dimethylaminopyridine (2 mg, 0.016 mmol) were added. The reaction was warmed to room temperature. After 3 hours, water (10 mL) was added, and then the reaction mixture was extracted with ethyl acetate (3 x 10 mL). The combined organic layer was washed with brine, dried over anhydrous sodium sulfate, filtered, and concentrated *in vacuo*. The crude extract was purified with flash chromatography, eluting with 75–100% ethyl acetate in hexanes to afford *S*-(2-acetamidoethyl)-3-methyldodecanethioate **10** (53 mg, 0.17 mmol, 72%).

TLC:  $R_f$  = 0.24 (silica gel, 1:1 hexanes:ethyl acetate).

HRMS (ESI): calc'd for  $C_{17}H_{34}NO_2S^+$  [ $M+H$ ]<sup>+</sup>, 316.2305; found, 316.2306.

<sup>1</sup>H NMR (500 MHz, CDCl<sub>3</sub>)  $\delta$ : 5.98 (s, 1H, NH), 3.41 (q, 2H,  $J$  = 6.2 Hz, NHCH<sub>2</sub>), 3.01 (t, 2H,  $J$  = 6.5 Hz, CH<sub>2</sub>CH<sub>2</sub>S), 2.55 (dd, 1H,  $J$  = 14.5 Hz, 5.9, SCOCH<sub>2</sub>), 2.36 (dd, 1H,  $J$  = 14.5, 8.2 Hz, SCOCH<sub>2</sub>), 1.98 (m, 1H, CH), 1.95 (s, 3H, NHCOCH<sub>3</sub>), 1.16-1.29 (m, 16H, CH<sub>2</sub>), 0.91 (d, 3H,  $J$  = 6.7 Hz, CHCH<sub>3</sub>), 0.86 (t, 3H,  $J$  = 6.9 Hz, CH<sub>2</sub>CH<sub>3</sub>).

$^{13}\text{C}$  NMR (125 MHz,  $\text{CDCl}_3$ )  $\delta$ : 199.84, 170.23, 51.34, 39.77, 36.56, 31.84, 31.09, 29.65, 29.56, 29.53, 29.26, 28.40, 26.79, 23.14, 22.62, 19.44, 14.06.

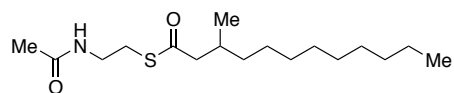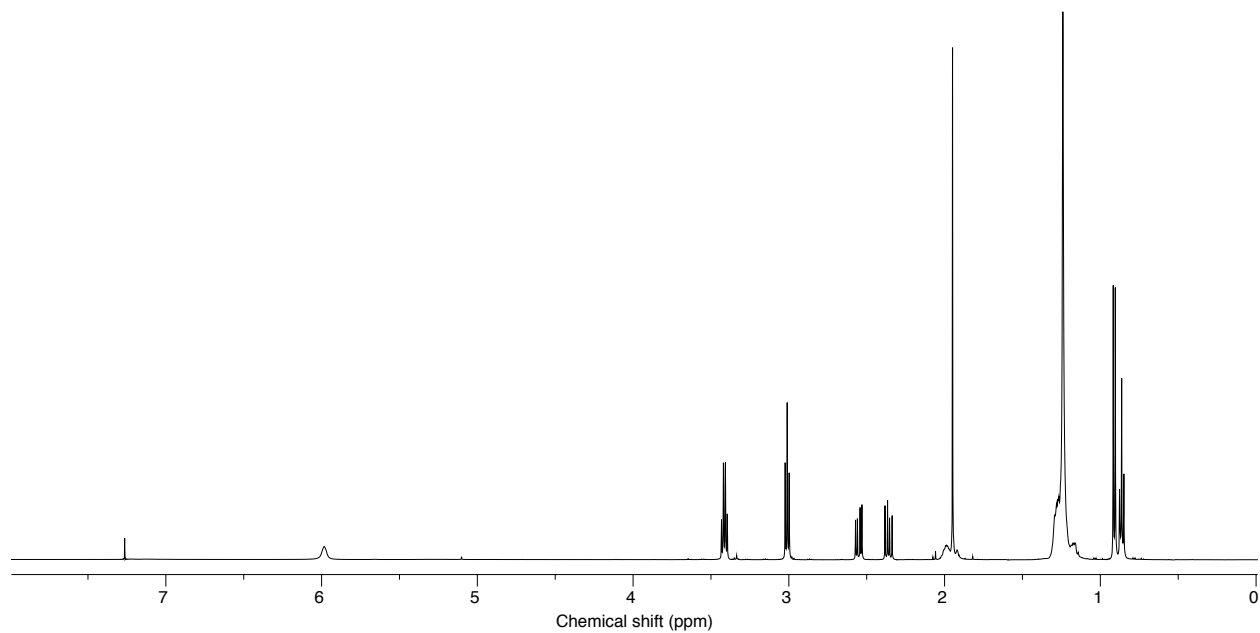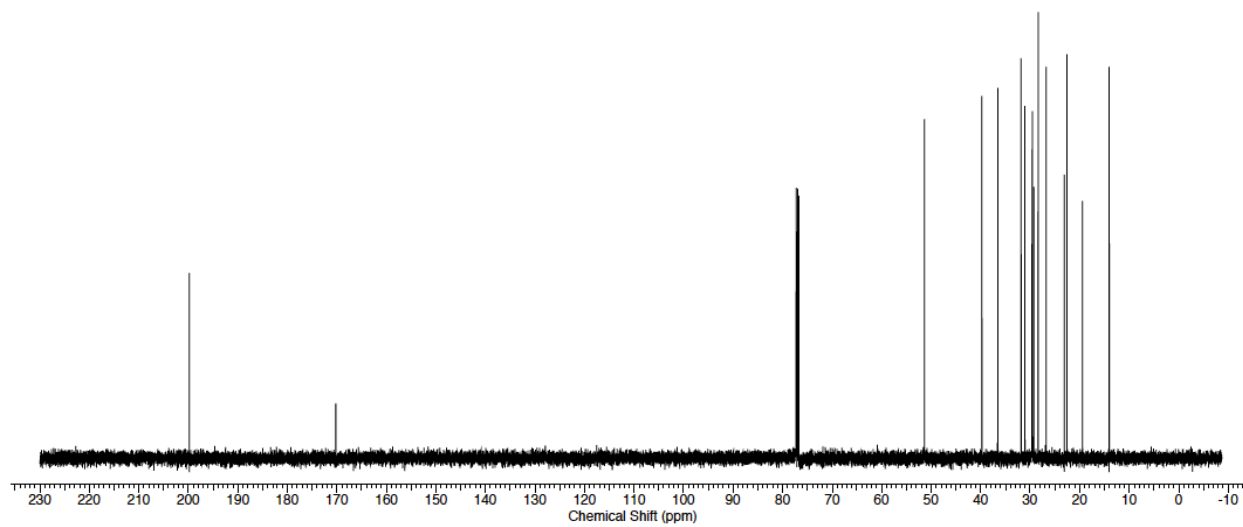

## Synthesis of standard for hydrolysis product (11)

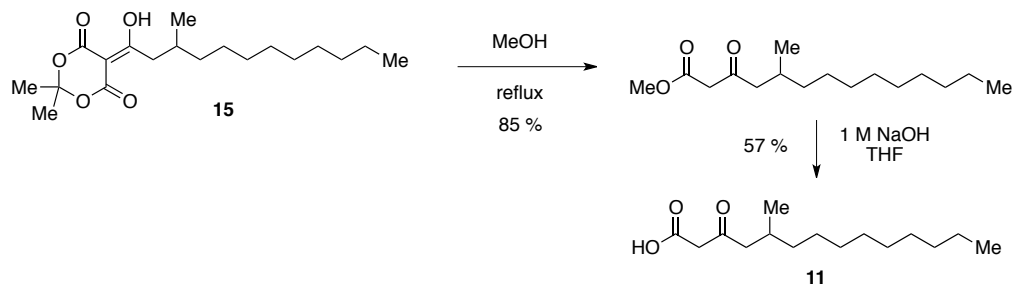

5-(1-Hydroxy-3-methyldodecylidene)-2,2-dimethyl-1,3-dioxane-4,6-dione (**15**) was prepared following the previously reported synthesis.<sup>3</sup>

### Methyl 5-methyl-3-oxotetradecanoate

**15** (556 mg, 1.63 mmol) was dissolved in anhydrous methanol (10 mL), and the solution was refluxed overnight under a nitrogen atmosphere. The solvent was removed *in vacuo*, and the crude reaction mixture was purified by flash chromatography eluting with 0-20% ethyl acetate in hexanes to afford methyl 5-methyl-3-oxotetradecanoate as mixture of keto and enol tautomers (375 mg, 1.39 mmol, 85%).

TLC:  $R_f = 0.92$  (silica gel, 1:1 hexanes:ethyl acetate).

HRMS (ESI): calc'd for  $C_{16}H_{31}O_3^+ [M+H]^+$ , 271.2268; found 271.2257; calc'd for  $C_{16}H_{30}NaO_3^+ [M+Na]^+$ , 293.2087; found 293.2081; calc'd for  $C_{16}H_{30}KO_3^+ [M+K]^+$ , 309.1827; found 309.1816.

$^1H$ -NMR (500 MHz;  $CDCl_3$ ):  $\delta$  12.02 (s, 1H, enol-CHCOH), 4.98 (s, 1H, enol-CHCOH), 3.78–3.74 (s, 3H, COOCH<sub>3</sub>), 3.45 (s, 2H, keto-CH<sub>3</sub>OCOCH<sub>2</sub>), 2.52 (dd, 1H,  $J = 16.5, 5.6$  Hz, keto-COCH<sub>2</sub>), 2.41 (dd, 1H,  $J = 15.8, 5.7$  Hz, enol-COCH<sub>2</sub>), 2.34 (dd, 1H,  $J = 16.5, 8.0$  Hz, keto-COCH<sub>2</sub>), 2.25–2.19 (m, 1H, enol-COCH<sub>2</sub>), 2.05–1.95 (m, 1H, CH), 1.21–1.35 (m, 16H, CH<sub>2</sub>), 0.96–0.86 (m, 6H, CH<sub>3</sub>).

$^{13}C$ -NMR (125 MHz;  $CDCl_3$ ):  $\delta$  202.47, 178.34, 172.98, 167.63, 89.77, 52.20, 51.28, 50.41,



49.45, 42.76, 36.96, 36.80, 31.95, 30.89, 29.82, 29.78, 29.67, 29.65, 29.38, 29.00, 26.97, 22.72, 19.82, 19.72, 14.11.

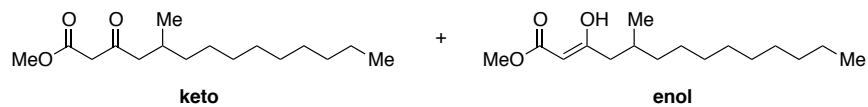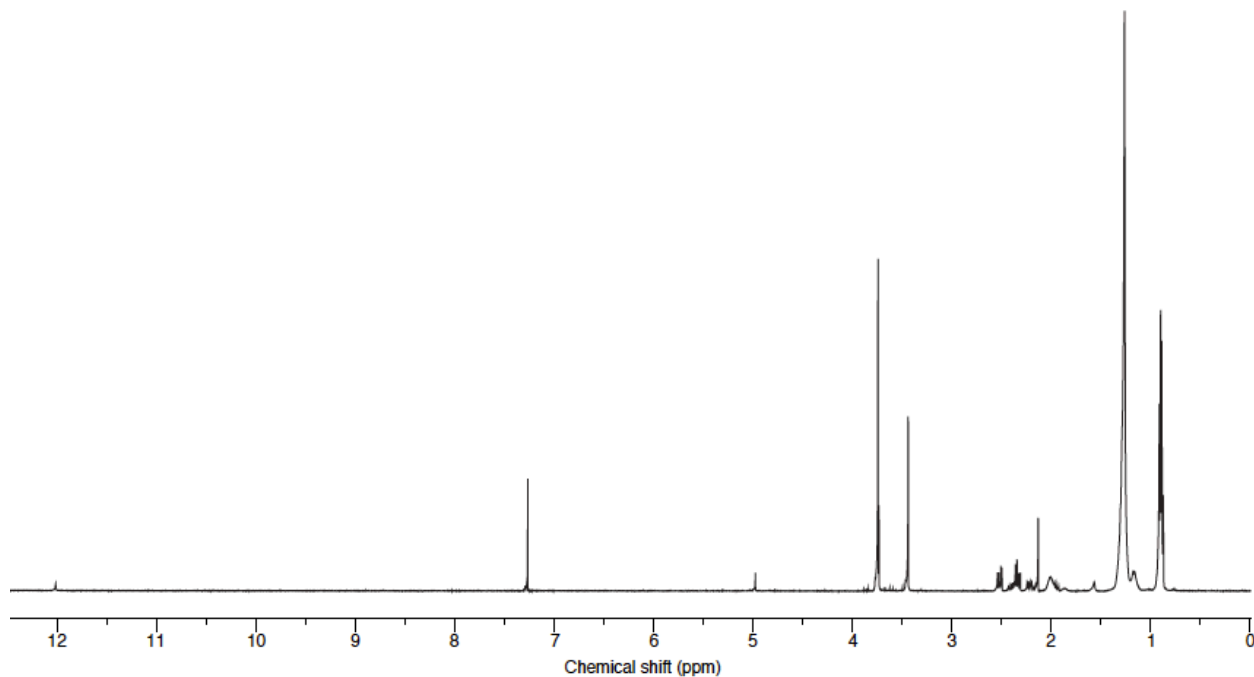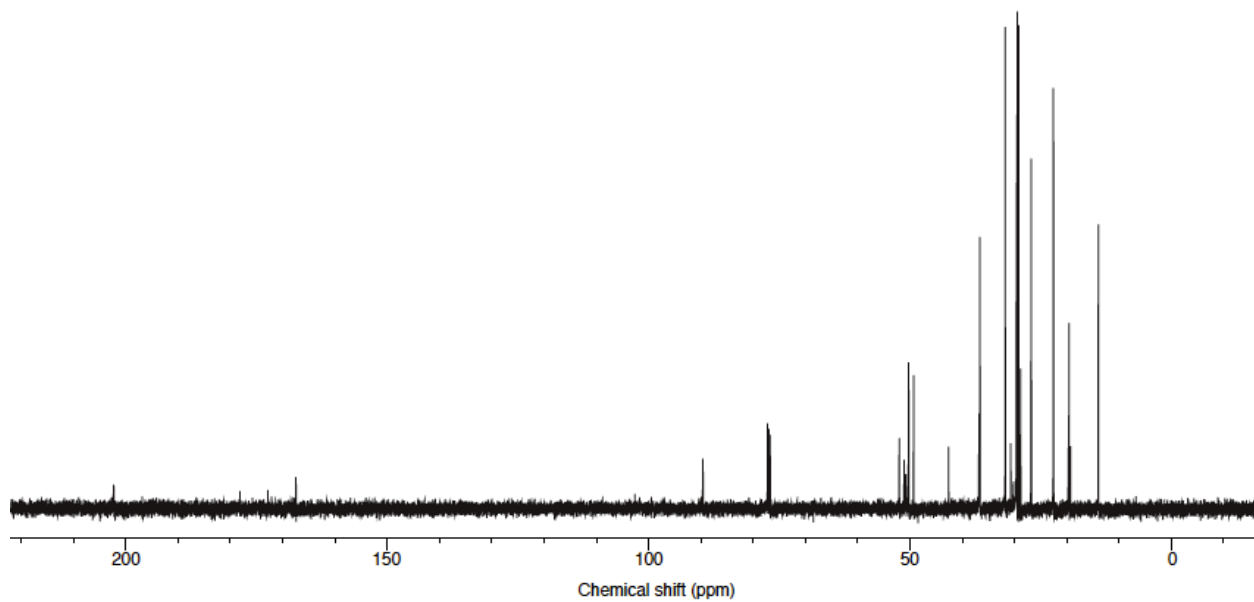

5-Methyl-3-oxotetradecanoic acid (Hydrolysis product **11**)

Methyl 5-methyl-3-oxotetradecanoate (50 mg, 0.185 mmol) was dissolved in isopropanol (2 mL), and 1 M NaOH aqueous solution (2 mL) was added. The reaction was stirred at room temperature for 3 h. The reaction was quenched with 1 M HCl (5 mL), and the aqueous layer was extracted with ethyl acetate (3 x 10 mL). The combined organic layers were washed with brine, dried over sodium sulfate, and concentrated *in vacuo*. The residue was purified by flash chromatography, eluting with 40–60% ethyl acetate in hexanes to give **11** as mixture of keto and enol tautomers (27 mg, 0.105 mmol, 57%).

TLC:  $R_f$  = 0.12 (silica gel, 1:1 hexanes:ethyl acetate).

HRMS (ESI): calc'd for  $C_{15}H_{27}O_3^-$  [M-H]<sup>-</sup>, 255.1966; found, 255.1963.

<sup>1</sup>H-NMR (500 MHz; CDCl<sub>3</sub>): δ 11.87 (s, 1H, enol-CHCOH), 5.02 (s, 1H, enol-CHCOH), 3.50 (s, 2H, keto-CH<sub>3</sub>OCOCH<sub>2</sub>), 2.55 (dd, 1H,  $J$  = 16.5, 5.6 Hz, keto-COCH<sub>2</sub>), 2.36 (dd, 1H,  $J$  = 16.5, 8.0 Hz, keto-COCH<sub>2</sub>), 2.24 (dd, 1H,  $J$  = 13.6, 5.9 Hz, enol-COCH<sub>2</sub>), 2.05–2.01 (m, 1H, CH), 1.98 (dd, 1H,  $J$  = 13.7, 8.3 Hz, enol-COCH<sub>2</sub>), 1.31–1.26 (m, 19H, CH<sub>2</sub>), 0.92 (d, 3H,  $J$  = 6.6 Hz, CHCH<sub>3</sub>), 0.88 (t, 3H,  $J$  = 6.9 Hz, CH<sub>3</sub>).

<sup>13</sup>C-NMR (125 MHz; CDCl<sub>3</sub>): δ 204.52, 181.46, 176.55, 171.18, 89.44, 70.40, 61.66, 50.77, 48.35, 43.12, 36.89, 32.04, 31.15, 29.85, 29.76, 29.47, 29.21, 27.06, 22.83, 19.86, 19.59, 14.26.

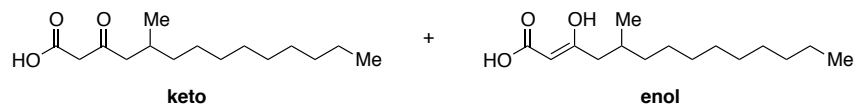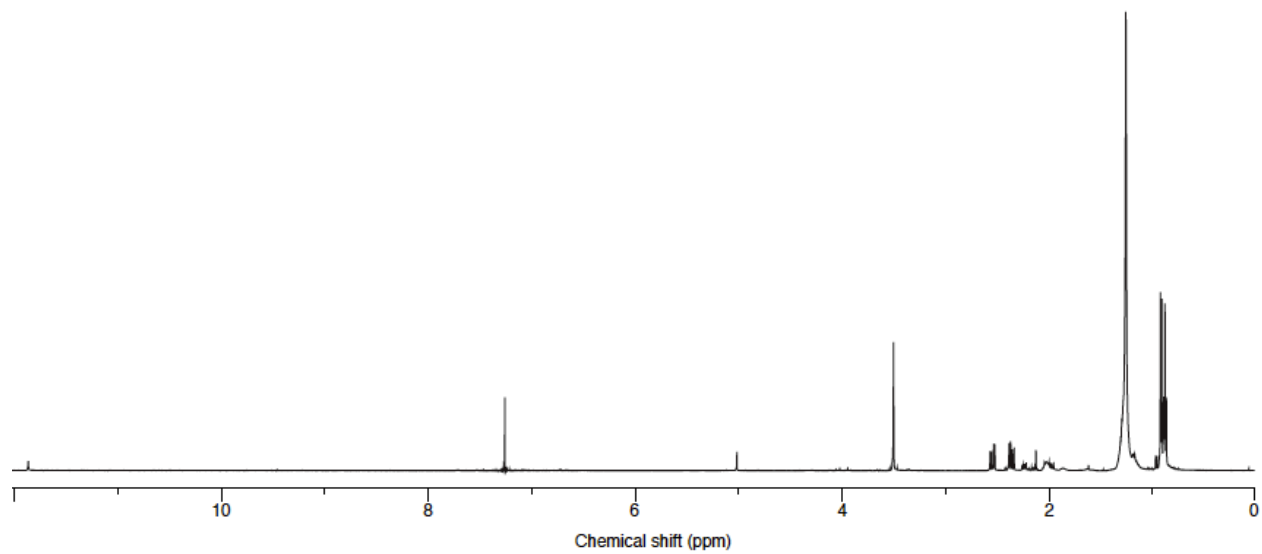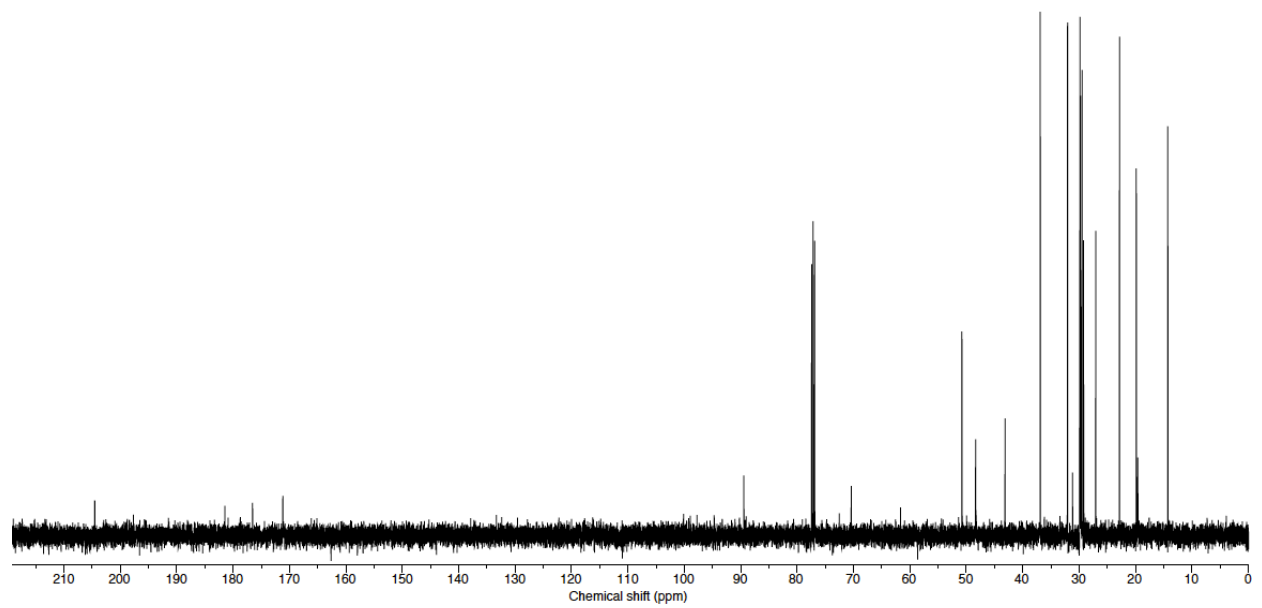

## Synthesis of internal standards for LC-MS quantitation assay

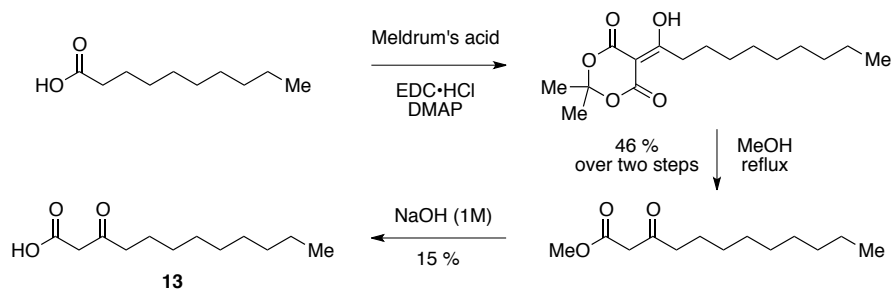

### 5-(1-Hydroxydeacylidene)-2,2-dimethyl-1,3-dioxane-4,6-dione

To an ice-cooled (0 °C) solution of decanoic acid (200 mg, 1.16 mmol) in dichloromethane (9 mL) under argon was added 2,2-dimethyl-1,3-dioxane-4,6-dione (167 mg, 1.16 mmol) and DMAP (426 mg, 3.48 mmol), followed by the dropwise addition of a solution of 1-(3-dimethylaminopropyl)-3-ethylcarbodiimide hydrochloride (245 mg, 1.28 mmol) in dichloromethane (3 mL). The reaction was allowed to slowly warm up to room temperature overnight. The reaction mixture was diluted with dichloromethane (30 mL), and the organic layer was washed with 1 M aqueous HCl (3 x 30 mL) and brine (30 mL). The organic layer was dried over sodium sulfate, filtered and concentrated *in vacuo* to give 5-(1-hydroxydeacylidene)-2,2-dimethyl-1,3-dioxane-4,6-dione as a yellow oil. The crude product was used directly in the next reaction without further purification.

TLC:  $R_f = 0.35$  (silica gel, 1:1 hexanes:ethyl acetate).

HRMS (ESI): calc'd for  $C_{16}H_{25}O_5^-$  [M-H]<sup>-</sup>, 297.1707; found, 297.1704.

<sup>1</sup>H and <sup>13</sup>C NMR data matched previously reported values.<sup>24</sup>

### Methyl 3-oxododecanoate

5-(1-Hydroxydeacylidene)-2,2-dimethyl-1,3-dioxane-4,6-dione (100 mg, 0.335 mmol) was dissolved in anhydrous methanol (5 mL), and the solution was refluxed overnight under an argon atmosphere. The solvent was removed *in vacuo* and the crude reaction mixture was purified by

flash chromatography, eluting with 0–20% ethyl acetate in hexanes to afford methyl 3-oxododecanoate as mixture of keto and enol tautomers (36 mg, 0.16 mmol, 46%).

TLC:  $R_f$  = 0.71 (silica gel, 1:1 hexanes:ethyl acetate).

HRMS (ESI): calc'd for  $C_{13}H_{25}O_3^+$   $[M+H]^+$ , 229.1798; found, 229.18117; calc'd for  $C_{13}H_{24}NaO_3^+$   $[M+Na]^+$ , 251.1618; found 251.1631; calc'd for  $C_{13}H_{24}KO_3^+$   $[M+K]^+$ , 267.1357; found, 267.1345.

$^1H$  and  $^{13}C$  NMR data matched previously reported values.<sup>25</sup>

### 3-Oxododecanoic acid (13)

Methyl 3-oxotetradecanoate (35 mg, 0.15 mmol) was dissolved in THF (2 mL), and 1 M NaOH solution (2 mL) was added. The reaction mixture was stirred at room temperature for 3 h. and then the THF was removed *in vacuo*. The resulting mixture was diluted with ethyl acetate (5 mL) and acidified with 1 M aqueous HCl (5 mL). The layers were separated and the aqueous layer was extracted with ethyl acetate (3 x 10 mL). The combined organic layers were washed with brine, dried over sodium sulfate, and concentrated *in vacuo*. The residue was purified by flash chromatography, eluting with 50–100% ethyl acetate in hexanes to give **13** as mixture of keto and enol tautomers (5.0 mg, 0.023 mmol, 15%).

TLC:  $R_f$  = 0.28 (silica gel, 1:1 hexanes:ethyl acetate).

HRMS (ESI): calc'd for  $C_{12}H_{21}O_3^-$   $[M-H]^-$ , 213.1496; found 213.1498.

$^1H$  NMR data matched previously reported values.<sup>25</sup>

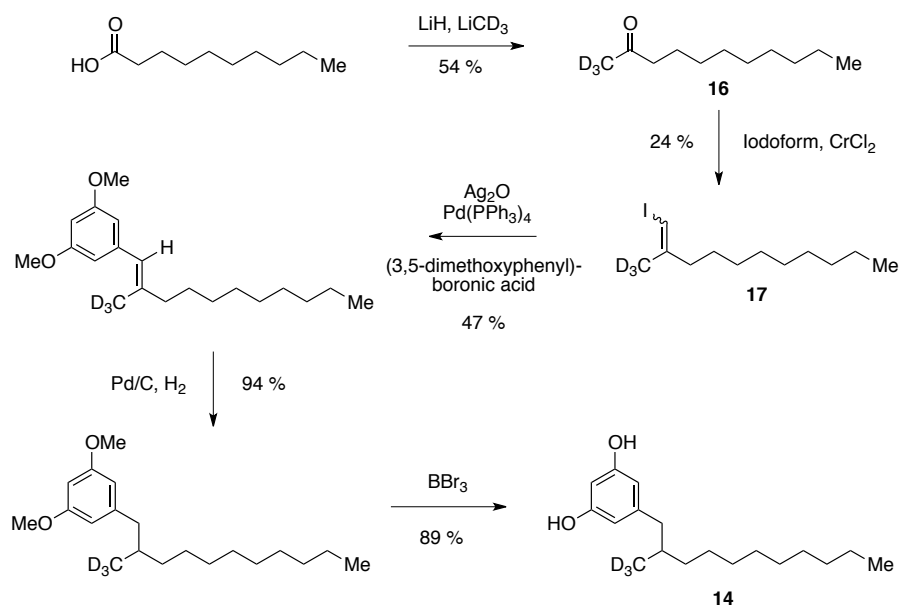

### [1,1,1-<sup>2</sup>H<sub>3</sub>]Undecan-2-one (**16**)

To a suspension of lithium hydride (73 mg, 8.7 mmol) in dimethoxyethane (30 mL), a solution of decanoic acid (1.0 g, 5.8 mmol) in dimethoxyethane (40 mL) was added dropwise. The reaction mixture was refluxed for 2.5 h under an argon atmosphere, and then cooled to room temperature. 0.5 M *d*<sub>3</sub>-methyl lithium solution (17.4 mL, 8.71 mmol) was added dropwise, and the mixture was stirred overnight. Excess *d*<sub>3</sub>-methyl lithium was quenched by addition of 1 M aqueous HCl (30 mL), the layers were separated, and the aqueous layer was extracted with ether (3 x 30 mL). The combined organic layers were washed with brine (40 mL), dried over sodium sulfate, filtered, and concentrated *in vacuo*. The residue was purified with flash chromatography, eluting with 5–10% ether in hexanes to give [1,1,1-<sup>2</sup>H<sub>3</sub>]undecan-2-one (**16**) as clear oil (540 mg, 3.12 mmol, 54%).

TLC: *R*<sub>f</sub> = 0.25 (silica gel, 1:9 ether:hexanes).

HRMS (ESI): calc'd for C<sub>11</sub>H<sub>20</sub>D<sub>3</sub>O<sup>+</sup> [M+H]<sup>+</sup>, 174.1932; found 174.1932; calc'd for C<sub>11</sub>H<sub>19</sub>NaD<sub>3</sub>O<sup>+</sup> [M+Na]<sup>+</sup>, 196.1751; found 196.1749.

<sup>1</sup>H NMR (300 MHz, CDCl<sub>3</sub>) δ: 2.34 (t, 2H, *J* = 7.6 Hz, COCH<sub>2</sub>), 1.49 (m, 2H, CH<sub>2</sub>), 1.29–1.12 (m, 12H, CH<sub>2</sub>), 0.80 (t, 3H, *J* = 6.6 Hz, CH<sub>2</sub>CH<sub>3</sub>).

$^{13}\text{C}$  NMR (125 MHz,  $\text{CDCl}_3$ )  $\delta$ : 209.09, 43.60, 31.72, 29.29, 29.27, 29.12, 29.04, 23.68, 22.51, 13.91.

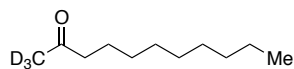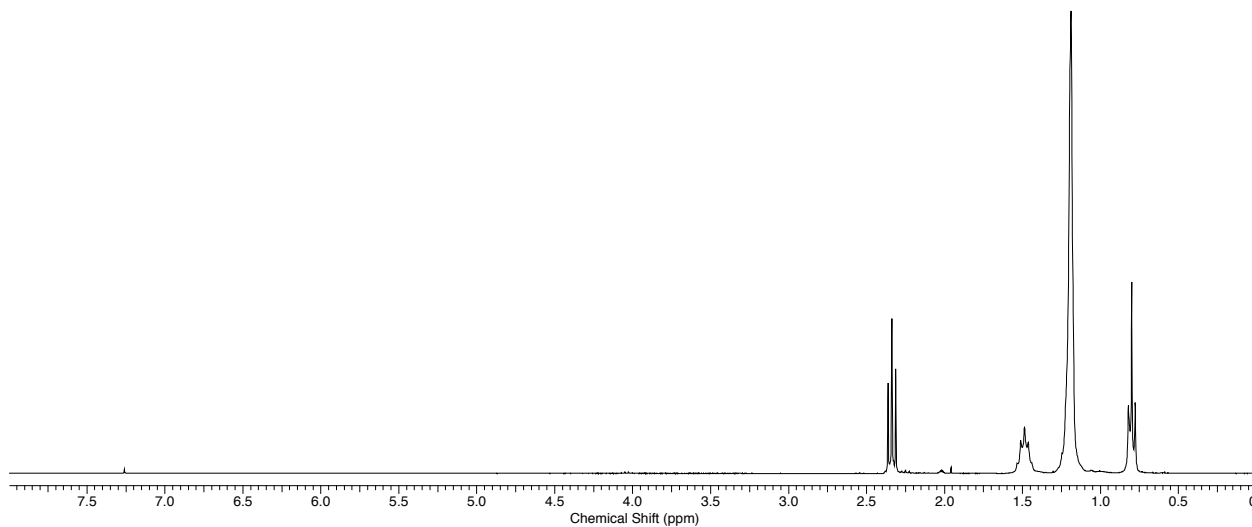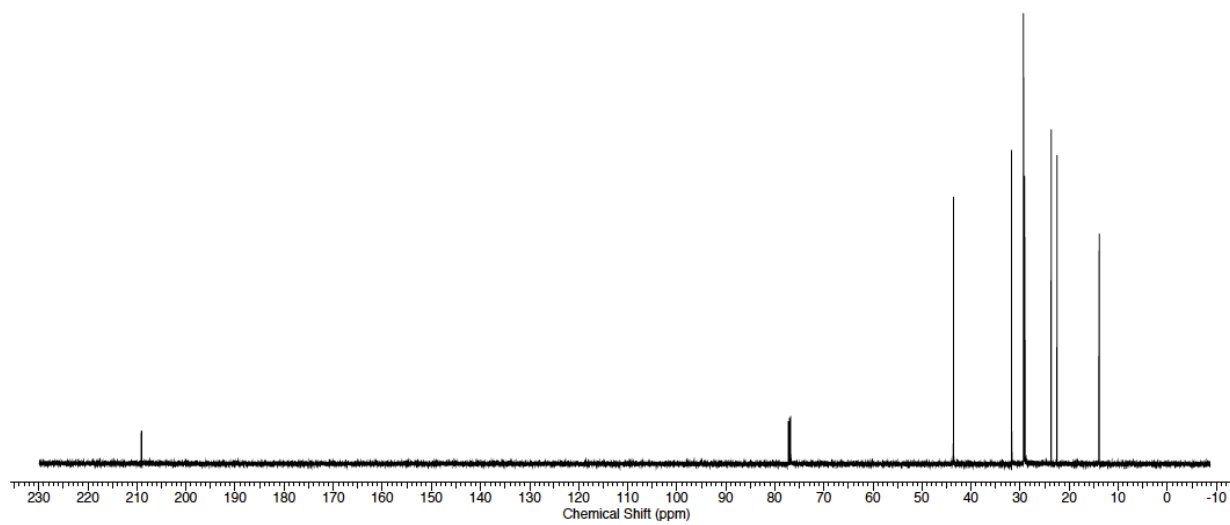

1-Iodo-2-[<sup>2</sup>H<sub>3</sub>]methylundec-1-ene (17)

To a solution of **16** (535 mg, 3.09 mmol) in THF (20 mL) under argon, chromium chloride (1.52 g, 12.4 mmol) was added. Then, a solution of iodoform (2.43 g, 6.17 mmol) in THF (10 mL) was added dropwise and the reaction mixture was stirred overnight at room temperature. The reaction mixture was diluted with 1 M aqueous HCl (30 mL) and then extracted with ether (3 x 30 mL). The combined organic layers were washed with a 20% w/v solution of sodium thiosulfate (40 mL), dried over sodium sulfate, filtered, and concentrated *in vacuo*. The residue was purified with flash chromatography, eluting with 100% hexanes to give 1-iodo-2-[<sup>2</sup>H<sub>3</sub>]methylundec-1-ene (**17**) as 5:3 mixture of *E* and *Z* stereoisomers (220 mg, 0.740 mmol, 24%). Approximately half of the starting material **16** was also recovered.

TLC:  $R_f$  = 0.88 (silica gel, 1:9 ether:hexanes).

<sup>1</sup>H NMR (300 MHz, CDCl<sub>3</sub>)  $\delta$ : 5.85 (s, 1H, *E*-alkene CH), 5.81 (s, 1H, *Z*-alkene CH), 2.18 (t, 2H,  $J$  = 7.2 Hz, CH<sub>2</sub>), 1.41 (m, 2H, CH<sub>2</sub>), 1.35–1.15 (m, 12H, CH<sub>2</sub>), 0.88 (t, 3H,  $J$  = 6.0 Hz, CH<sub>2</sub>CH<sub>3</sub>).

<sup>13</sup>C NMR (125 MHz, CDCl<sub>3</sub>) *E*-stereoisomer  $\delta$ : 148.21, 74.28, 39.56, 31.87, 29.53, 29.39, 29.30, 29.05, 27.70, 22.67, 14.11; *Z*-stereoisomer  $\delta$ : 147.76, 73.80, 38.63, 31.87, 29.51, 29.39, 29.30, 29.05, 26.95, 22.67, 14.11.

\*<sup>13</sup>C NMR peaks of the two isomers were assigned by comparing with the previously reported <sup>13</sup>C NMR peaks of the pure *E*-stereoisomer.<sup>3</sup>



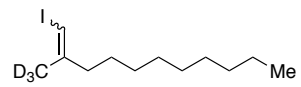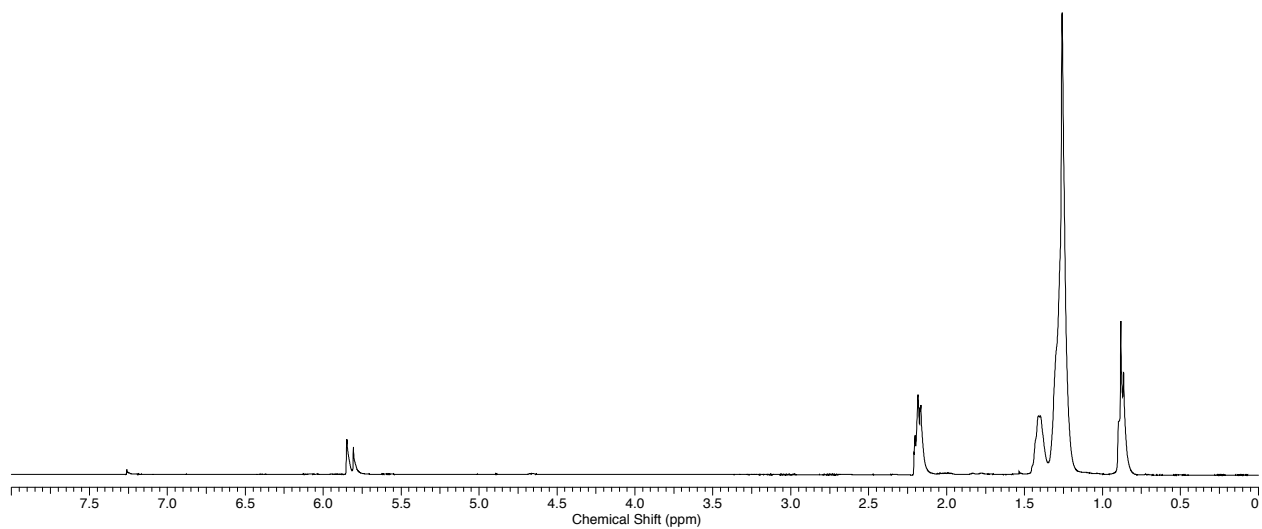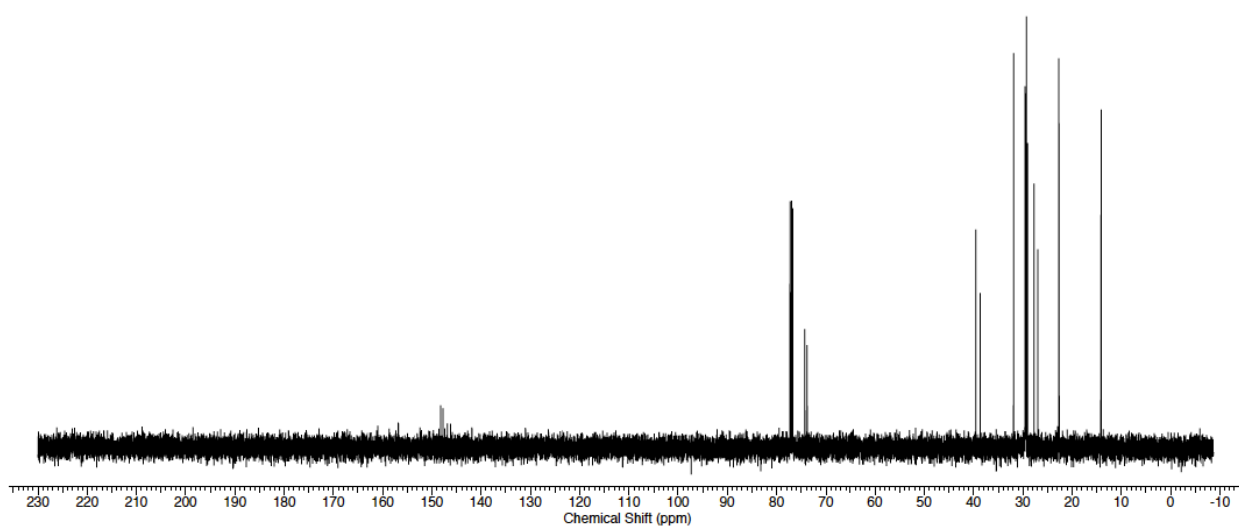

*d*<sub>3</sub>-Resorcinol (14)

*d*<sub>3</sub>-Resorcinol (**14**) was prepared from **17** following the previously reported synthesis.<sup>3</sup>

HRMS (ESI): calc'd for C<sub>18</sub>H<sub>26</sub>D<sub>3</sub>O<sub>2</sub><sup>-</sup> [M-H]<sup>-</sup>, 280.2361; found 280.2359.

<sup>1</sup>H NMR (400 MHz, CDCl<sub>3</sub>) δ: 6.22 (d, 2H, *J* = 2.2 Hz, aromatic CH), 6.18 (d, 1H, *J* = 2.2 Hz, aromatic CH), 5.28 (s, 2H, OH), 2.51 (dd, 1H, *J* = 13.4, 6.1 Hz, benzylic CH<sub>2</sub>), 2.19 (dd, 1H, *J* = 13.6, 8.5 Hz, benzylic CH<sub>2</sub>), 1.63 (m, 1H, CH), 1.35–1.23 (m, 15H, CH<sub>2</sub>), 1.11 (m, 1H, CH<sub>2</sub>), 0.88 (t, 3H, *J* = 6.8 Hz, CH<sub>2</sub>CH<sub>3</sub>).

<sup>13</sup>C NMR (125 MHz, CDCl<sub>3</sub>) δ: 156.25, 145.05, 108.88, 100.22, 43.53, 36.74, 34.46, 31.91, 29.91, 29.72, 29.64, 29.35, 27.12, 22.68, 14.10.

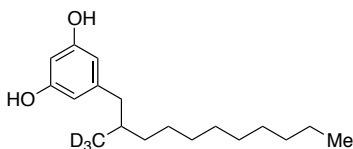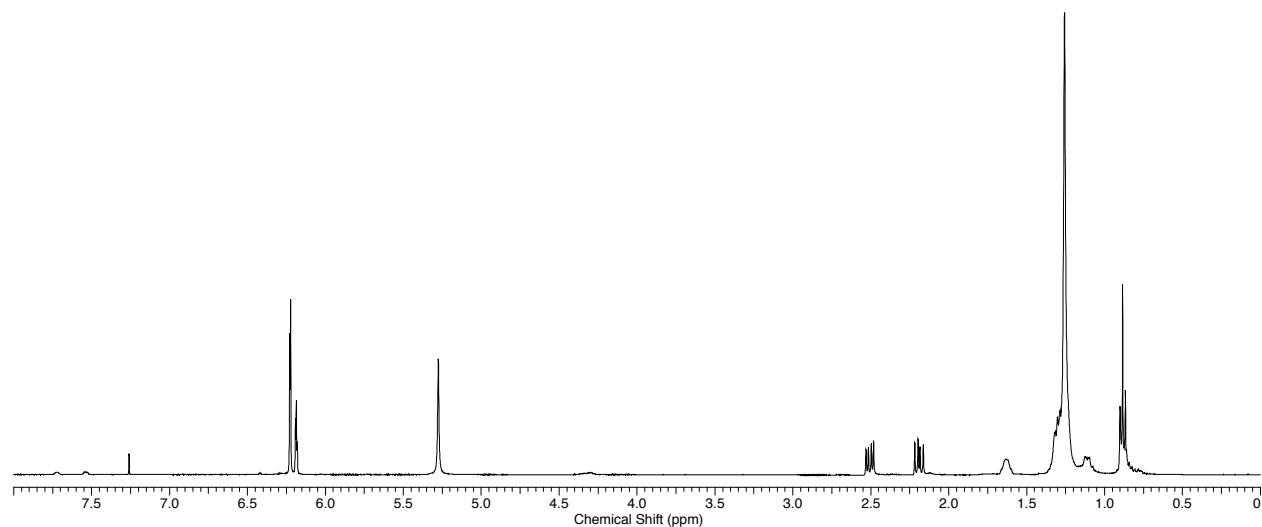

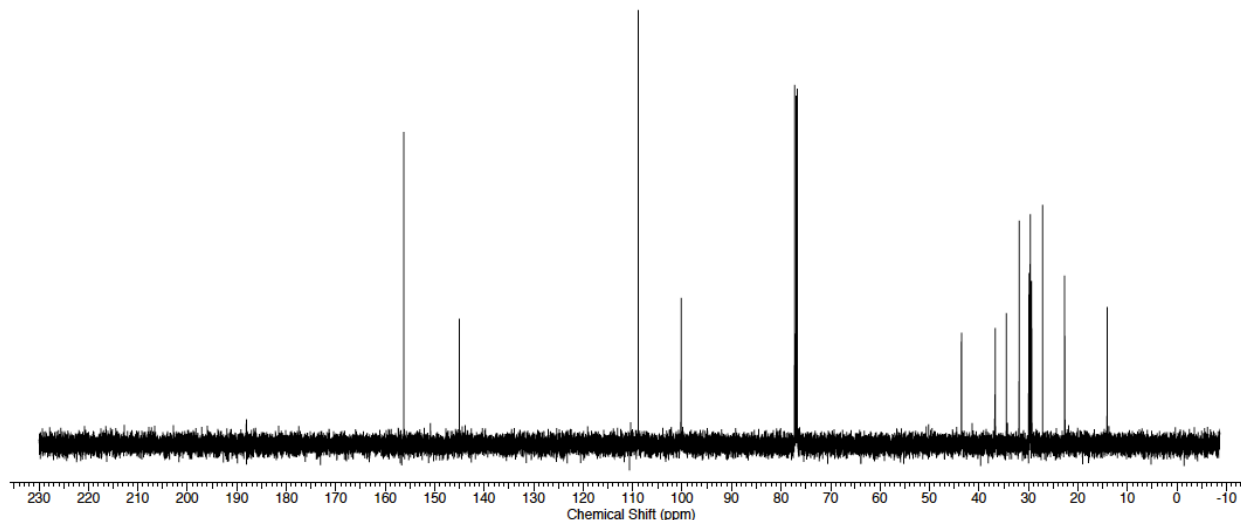

### General method for preparation of acyl-SNAC substrates for spectrophotometric assay

The following procedure was used for preparing propionyl-, butyryl-, pentanoyl- and hexanoyl-SNAC substrates. To free acid (1.03 mmol) in a flask cooled to 0 °C, a solution of EDC•HCl (360 mg, 1.88 mmol) in dry dichloromethane (3 ml) dissolved in dry dichloromethane (3 ml) was added. The mixture was stirred at 0 °C for 20 min, and then *N*-acetylcysteamine (100  $\mu$ L, 0.94 mmol) and DMAP (11.5 mg, 0.094 mmol) were added. The reaction was warmed to room temperature and stirred for three more hours. The reaction was quenched with water (10 mL) and extracted with ethyl acetate (3 x 15 mL). The combined organic layer was washed with 1 M HCl (30 mL), saturated sodium bicarbonate solution (30 mL) and then brine (30 mL). The organic fraction was then dried over anhydrous sodium sulfate and concentrated *in vacuo* to afford desired acyl-SNAC products. The isolated yields were as follows: propionyl-SNAC (97 mg, 0.55 mmol, 59%), butyryl-SNAC (135 mg, 0.71 mmol, 76%), pentanoyl-SNAC (138 mg, 0.68 mmol, 72%), and hexanoyl-SNAC (159 mg, 0.73 mmol, 78%).

$^1\text{H}$  and  $^{13}\text{C}$  NMR data matched previously reported values.<sup>26</sup>

## References

1. C. M. Stoscheck, *Method. Enzymol.*, 1980, **182**, 50.
2. ExPASy ProtParam tool, <http://www.expasy.org/tools/protparam.html> (accessed October 2013)
3. H. Nakamura, H. A. Hamer, G. Sirasani, E. P. Balskus, *J. Am. Chem. Soc.*, 2012, **134**, 18518.
4. E. Yeh, R. M. Kohli, S. D. Bruner, C. T. Walsh, *ChemBioChem*, 2004, **5**, 1290.
5. (a) Geneious, version 7.1.6, Biomatters, Auckland, New Zealand, 2014; (b) M. Kearse, R. Moir, A. Wilson, S. Stones-Havas, M. Cheung, S. Sturrock, S. Buxton, A. Cooper, S. Markowitz, C. Duran, T. Thierer, B. Ashton, P. Meintjes, A. Drummond, *Bioinformatics*, 2012, **28**, 1647.
6. J. J. Gehret, L. Gu, W. H. Gerwick, P. Wipf, D. H. Sherman, J. L. Smith, *J. Biol. Chem.*, 2011, **286**, 14445.
7. J. J. La Clair, T. L. Foley, T. R. Schegg, C. M. Regan, M. D. Burkart, *Chem. Biol.*, 2004, **11**, 195.
8. J. Yin, A. J. Lin, D. E. Golan, C. T. Walsh, *Nat. Protoc.*, 2006, **1**, 280.
9. P. Beltran-Alvarez, R. J. Cox, J. Crosby, T. J. Simpson, *Biochemistry*, 2007, **46**, 14672.
10. NCBI public database, <http://www.ncbi.nlm.nih.gov/>, (accessed October 2013 through January 2014).
11. PKS/NRPS Analysis Web Server, <http://nrps.igs.umaryland.edu/nrps/>, (accessed January 2014).
12. HHPred, Bioinformatics Toolkit, Max-Planck Institute for Developmental Biology, <http://toolkit.tuebingen.mpg.de/hhpred>, (accessed January 2014).
13. H. B. Claxton, D. L. Akey, M. K. Silver, S. J. Admiraal, J. L. Smith, *J. Biol. Chem.*, 2009, **284**, 5021.
14. J. R. Whicher, G. Florova, P. K. Sydor, R. Singh, M. Alhamadsheh, G. L. Challis, K. A. Reynolds, J. L. Smith, *J. Biol. Chem.*, 2011, **286**, 22558.
15. Modeller, Bioinformatics Toolkit, Max-Planck Institute for Developmental Biology, <http://toolkit.tuebingen.mpg.de/modeller>, (accessed January 2014).
16. MacPyMOL, version 1.7, Schrödinger, Inc., New York City, NY, 2014.
17. J. P. Huelsenbeck, F. Ronquist, *Bioinformatics*, 2001, **17**, 754.
18. K. Buntin, K. J. Weissman, R. Müller, *ChemBioChem*, 2010, **11**, 1137.

19. M. Kotaka, R. Kong, I. Qureshi, Q. S. Ho, H. Sun, C. W. Liew, L. P. Goh, P. Cheung, Y. Mu, J. Lescar, Z.-X. Liang, *J. Biol. Chem.*, 2009, **284**, 15739.
20. Y. Zou, H. Yin, D. Kong, Z. Deng, S. Lin, *ChemBioChem*, 2013, **14**, 679.
21. X. Yin, T. M. Zabriskie, *Microbiology*, 2006, **152**, 2969.
22. B. Julien, Z.-Q. Tian, R. Reid, C. D. Reeves, *Chem. Biol.*, 2006, **13**, 1277.
23. *US pat.*, 65900083 B1, 2003.
24. *WO pat.*, 2009050575 A1, 2009.
25. E. E. Kwan, J. R. Scheerer, D. A. Evans, *J. Org. Chem.*, 2013, **78**, 175.
26. G. Prasad, L. S. Borketey, T.-Y. Lin, N. A. Schnarr, *Org. Biol. Chem.*, 2012, **10**, 6717.
